1 **Endothelial sphingosine-1-phosphate receptor 1 deficiency exacerbates brain**  
2 **injury and blood brain barrier dysfunction upon subarachnoid hemorrhage in**  
3 **mice.**

4  
5 Akira Ito<sup>1,4, #</sup>, Hiroki Uchida<sup>1, #</sup>, Gab Seok Kim<sup>1, &</sup>, Giuseppe Faraco<sup>2</sup>, Richard Proia<sup>3</sup>,  
6 Kuniyasu Niizuma<sup>4-6</sup>, Teiji Tominaga<sup>4</sup>, Josef Anrather<sup>2</sup>, Costantino Iadecola<sup>2</sup>, Michael J  
7 Kluk<sup>1</sup> and Teresa Sanchez<sup>1,2, \*</sup>.

8  
9 <sup>1</sup>Department of Pathology and Laboratory Medicine, Center for Vascular Biology, Weill  
10 Cornell Medicine, New York, NY

11 <sup>2</sup>Feil Family Brain and Mind Research Institute, Weill Cornell Medicine, New York, NY.

12 <sup>3</sup>Genetics of Development and Disease Branch, NIDK, NIH, Bethesda, MD.

13 <sup>4</sup>Department of Neurosurgery, Tohoku University Graduate School of Medicine, Sendai,  
14 Japan

15 <sup>5</sup>Department of Neurosurgical Engineering and Translational Neuroscience, Graduate  
16 School of Biomedical Engineering, Tohoku University, Sendai, Japan

17 <sup>6</sup>Department of Neurosurgical Engineering and Translational Neuroscience, Tohoku  
18 University Graduate School of Medicine, Sendai, Japan

19 # Equal contributions

20 & Current address: Department of Neurology, UTHealth, McGovern Medical School,  
21 Houston TX.

22 \* Correspondence to: Teresa Sanchez, PhD. Department of Pathology and Laboratory  
23 Medicine, Center for Vascular Biology and Feil Family Brain and Mind Research  
24 Institute, Weill Cornell Medicine, 1300 York Ave, A607B, New York, NY 10065.

25

26 **ABSTRACT**

27 Blood brain barrier (BBB) dysfunction upon ischemia and hypoxia has been  
28 implicated in the exacerbation of neuronal injury in stroke. Despite the therapeutic  
29 potential of the cerebrovascular endothelium, the limited understanding of the  
30 endothelial signaling pathways governing BBB function restricts progress towards  
31 developing novel therapeutic approaches specifically targeting the endothelium.  
32 Sphingosine-1-phosphate (S1P) is a potent modulator of endothelial function via its  
33 receptors (S1PR). Recent human and mouse studies indicate that vasoprotective  
34 endothelial S1P signaling via S1PR1 may be impaired in cardiovascular and  
35 inflammatory diseases. Herein, we investigated the expression of S1PR1 in the mouse  
36 and human cerebrovascular endothelium and the role of endothelial-specific S1PR1  
37 signaling in brain injury in a mouse model of aneurysmal subarachnoid hemorrhage  
38 (SAH), the most devastating type of stroke. We found that S1PR1 is the most abundant  
39 S1PR transcript in the mouse brain and in mouse and human brain endothelial cells (20-  
40 100 mRNA copies per cell). S1PR1 transcripts were significantly enriched (~6 fold) in  
41 mouse cortical microvessels compared to total brain. Using the S1PR1-eGFP knock in  
42 mouse, we found that S1PR1-eGFP is abundantly expressed in the cerebrovascular  
43 endothelium in the mouse brain. A similar pattern of expression was observed in human  
44 brain samples. Endothelial specific deletion of S1PR1 in adult mice (*S1pr1*<sup>flox/flox</sup> × *Cdh5*-  
45 *Cre*<sup>ERT2</sup>, referred to as *S1pr1*<sup>iECKO</sup>), resulted in exacerbation of brain edema, neuronal  
46 injury and worsened neurological outcomes upon SAH compared to *S1pr1*<sup>flox/flox</sup>  
47 littermates. No differences in the subarachnoid blood, hemostasis or cerebral blood flow  
48 changes during and after SAH were found between groups. Mechanistically, *S1pr1*<sup>iECKO</sup>  
49 exhibited aggravated BBB dysfunction and increased phosphorylation of myosin light  
50 chain (MLC) in isolated cortical microvessels, a downstream effector of the Rho-ROCK  
51 pathway implicated in endothelial inflammation and barrier dysfunction. Taken together,  
52 our data indicate that S1PR1 is an endogenous protective signaling pathway in the  
53 endothelium, critical to maintain BBB function and to mitigate neuronal injury in  
54 pathological conditions. Thus, the therapeutic and diagnostic potential of the endothelial  
55 sphingosine-1-phosphate pathway in stroke deserves further study.

56

## 57 INTRODUCTION

58 Despite decades of intensive research, stroke is still a leading cause of mortality and  
59 long-term disability worldwide [1] and novel therapeutic strategies are need. The  
60 cerebrovascular endothelium, in coordination with pericytes [2, 3] and astrocytes [4]  
61 plays a critical role in the maintenance of the blood brain barrier (BBB). BBB dysfunction  
62 has been implicated in the exacerbation of neurovascular ischemic, hypoxic and  
63 inflammatory injury in stroke. For instance, the use and effectiveness of current  
64 therapies for ischemic stroke (i.e. tissue plasminogen activator, tPA, or mechanical  
65 recanalization) are severely limited by the vascular complications of reperfusion injury  
66 (i.e. blood brain barrier dysfunction leading to vasogenic edema and hemorrhagic  
67 transformation)[5-9]. In hemorrhagic stroke, perihematoma edema and volume  
68 expansion is associated with worsened outcomes [10]. In subarachnoid hemorrhage  
69 (SAH), blood brain barrier breakdown occurs in the acute phase and correlates with  
70 more severe neurological deficits [11-13]. Although the therapeutic potential of the  
71 cerebrovascular endothelium is beginning to be recognized [14-17], *the limited*  
72 *understanding of the endothelial signaling pathways governing BBB function/dysfunction*  
73 *in pathological conditions, restricts progress towards developing novel endothelial-*  
74 *targeted therapies.*

75 S1P, a bioactive lipid very abundant in plasma, is a potent modulator of endothelial and  
76 lymphocyte function. Plasma S1P originates from endothelial cells[18, 19] and  
77 erythrocytes[20] and it is bound to lipoproteins (e.g. HDL[21, 22] via apolipoprotein M  
78 (ApoM)[22], albumin and other chaperones. In mice, S1P signaling via S1PR1 is  
79 required for embryonic and postnatal vascular development and maturation in brain and  
80 other organs [23, 24] [25]. In adult mice, S1PR1 promotes endothelial barrier function,  
81 vascular stabilization and inhibits endothelial inflammation [26-28]. These effects are  
82 dependent on the activation of anti-inflammatory signaling pathways (Gi-

83 phosphatidylinositol-3-kinase leading to activation of Rac and Akt) which strengthen  
84 endothelial barrier function by promoting actin cytoskeleton dynamics (cortical actin  
85 assembly) and adherens junctions assembly to the cytoskeleton. In contrast, S1P  
86 binding to S1PR2 induces barrier dysfunction and activates pro-inflammatory signaling  
87 pathways (e.g. NF $\kappa$ B) in a Rho-Rho kinase dependent way. S1P-S1PR1  
88 antiinflammatory signaling pathway is predominant in the endothelium when S1P is  
89 bound to HDL via ApoM [28] (Reviewed in [17]). Indeed, a good part of the  
90 cardiovascular protective effects of HDL depend on its content of S1P [29-31] and ApoM  
91 [28], which also has been shown to protect plasma S1P from degradation [22]. Recent  
92 studies indicate that S1P anti-inflammatory and vasoprotective signaling via S1PR1  
93 could be limiting in human cardiovascular and inflammatory diseases [31-34] [17]. For  
94 instance, in coronary artery disease, the content of ApoM or S1P in the HDL fraction is  
95 significantly reduced, and it inversely correlates with the severity of the disease[31, 32].  
96 In addition, in patients suffering inflammatory conditions such diabetes or sepsis, plasma  
97 ApoM levels are significantly decreased compared to control patients [35, 36].  
98 Interestingly, S1PR1 also plays a critical role in lymphocyte trafficking and function: mice  
99 lacking S1PR1 in hematopoietic cells are lymphopenic due to impaired egress from  
100 thymus and lymphoid organs [37]. Indeed, the immunosuppressors, Fingolimod (FTY720)  
101 [38, 39], and Siponimod (BAF312)[40], which have been approved by the FDA for  
102 multiple sclerosis are potent S1PR1 agonists. Given the phenotype of the mice lacking  
103 S1PR1 in hematopoietic cells[37] and *in vitro* studies which indicate that FTY720-P  
104 induces desensitization of S1PR1 [41, 42], it is accepted that Fingolimod, Siponimod and  
105 other agonists [43] and antagonists [44] of S1PR1 lead to immunosuppression via  
106 inhibition of S1PR1 signaling in lymphocytes.  
107 Recent studies attempting to understand the role of S1P in cerebral ischemia have relied  
108 on the use of these pharmacological modulators of S1PR1 [45, 46] [47] [48], which

109 protected in experimental stroke. Although the mechanisms are not completely clear,  
110 FTY720 protection has been attributed to its immunosuppressive effects [48] and its  
111 ability to desensitize S1PR1 (reviewed in [17]). *Thus, these studies could not determine*  
112 *the role of endothelial-specific S1P signaling in BBB function modulation and its impact*  
113 *on brain injury and stroke outcomes.* Although immunosuppression is protective in  
114 experimental stroke, it is not clear that it could be a good therapeutic strategy in humans,  
115 since it also increases the vulnerability of patients to infections [49, 50], a leading cause  
116 of mortality in stroke patients[51, 52]. Nevertheless, Fingolimod [53-55] and Siponimod  
117 are currently being tested in stroke clinical trials. *Understanding the role of endothelial*  
118 *S1P signaling in stroke will be pivotal for future design of novel vasoprotective*  
119 *therapeutic agents targeting this pathway specifically in the endothelium without*  
120 *compromising the immune response.*

121 In order to bridge this knowledge gap and given the pathophysiological relevance of the  
122 S1P-S1PR1 pathway in humans, in this study we aimed to investigate the expression of  
123 S1PR1 in the mouse and human cerebrovascular endothelium as well as the role of  
124 endothelial-specific S1PR1 signaling in modulation of blood brain barrier function and its  
125 impact on brain injury upon subarachnoid hemorrhage, the most devastating type of  
126 stroke. Our results show that S1PR1 is an endogenous protective signaling pathway in  
127 the endothelium, critical to maintain BBB function and to mitigate neuronal injury in SAH.  
128 They also highlight the critical role of the endothelial S1PR1 pathway in the  
129 pathophysiology of cerebral hypoxia-ischemia as well as its therapeutic potential.

## 130 **METHODS**

131 **Mice.** All animal experiments were approved by the Weill Cornell Institutional Animal  
132 Care and Use Committee. Endothelial cell specific *S1pr1* knockout mice  
133 (*S1pr1<sup>flox/flox</sup>xCdh5-Cre<sup>ERT2</sup>*; referred to as *S1pr1<sup>iECKO</sup>*) were generated as we have  
134 described [56]. *S1pr1<sup>flox/flox</sup>* mice [24] were crossed to *Cdh5-Cre<sup>ERT2</sup>* mice [57] to

135 generate *S1pr1<sup>flox/flox</sup> Cdh5-Cre<sup>ERT2</sup>* mice. Mice were treated with tamoxifen (Sigma-  
136 Aldrich) by oral gavage (75 mg kg<sup>-1</sup>) for 3 days at the age of 8 weeks and used for the  
137 experiments 3-4 weeks after tamoxifen treatment. *S1pr1<sup>flox/flox</sup>* littermates treated with  
138 tamoxifen were used as control mice. *S1pr1-eGFP* knock in mice [58] weighing 26-30 g  
139 were used for the expression studies. All experiments were performed in male mice.

140 **Isolation of cortical microvessels.** The brain microvessels were isolated as we have  
141 previously described [59]. All procedures were performed in a cold room. The brains  
142 were collected and rinsed in MCDB131 medium (Thermo Fisher Scientific) with 0.5%  
143 fatty acid-free BSA (Millipore Sigma). The leptomeninges, cerebellum, brainstem and  
144 white matter were removed on ice. Ipsilateral cortices were homogenized in 8 mL of  
145 MCDB131 medium with 0.5% fatty acid-free BSA using a 7-mL loose-fit Dounce tissue  
146 grinder (Sigma-Aldrich) with 10 strokes. The homogenates were centrifuged at 2,000 g  
147 for 5 min at 4 °C. The pellet was suspended in 15% dextran (molecular weight ~70,000  
148 Da, Sigma-Aldrich) in PBS and centrifuged at 10,000 g for 15 min at 4 °C. The pellet was  
149 resuspended in MCDB131 with 0.5% fatty acid-free BSA and centrifuged at 5,000 g for  
150 10 min at 4 °C. The pellet contained the brain microvessels.

151 **Isolation of mouse primary neurons and mouse mixed glial cells.**

152 Mouse (C57BL6) E16.5 embryos were used for primary cortical neuron isolation as we  
153 previously described [60]. Cortices were collected and incubated with 0.25% trypsin for  
154 15 min at 37 °C for tissue digestion. Fetal bovine serum was added to stop the trypsin  
155 activity. After centrifugation, the supernatant was discarded and DMEM complete media  
156 containing 10% FBS and antibiotics were added to the cells. The cell suspension was  
157 passed through 70 μm cell strainer (BD Biosciences, Falcon) and was plated on poly-L-  
158 lysine (Sigma Aldrich, St Louis, MO) coated dishes with DMEM complete media. The  
159 next day, the medium was changed to Neurobasal media containing B27 supplement,  
160 antibiotics and GlutaMAX (Life Technologies). At 7 days *in vitro*, the cells (>95% NeuN

161 positive) were harvested for RNA isolation and gene expression quantification by  
162 reverse transcription and quantitative PCR (RT-qPCR).

163 Mixed glial cell culture was prepared using the mouse brains from postnatal day 2  
164 mouse as we previously described [60] Briefly, cerebral cortices were dissected,  
165 trypsinized with of 0.25% trypsin–EDTA in Hank's Balance Salt Solution (HBSS) and  
166 were incubated with trypsin (Thermo scientific) and DNase (Worthington) for 15 min at  
167 37°C. Foetal bovine serum was added to the cell suspension to stop trypsin digestion.  
168 Cell suspension was centrifuged and the pellet was resuspended with DMEM containing  
169 20% FBS and antibiotics. Cell suspension was filtered with a 100-µm cell strainer (BD  
170 Falcon) into another 50 ml conical tube. Cells were plated onto six-well plates, which  
171 were pre-coated with poly-D-lysine. Three days after plating, the media was changed to  
172 DMEM containing 10% FBS and antibiotics. Cells were maintained in DMEM containing  
173 10% FBS and antibiotics at 37°C with 5% CO<sub>2</sub>, with a medium change every 3 days.  
174 At day 10 after plating RNA was isolated for determination of gene expression by RT-  
175 qPCR.

176 **Endovascular perforation SAH surgery.** SAH surgery was performed on C57/BL6/J,  
177 *S1pr1*<sup>iECKO</sup> mice and their littermate *S1pr1*<sup>flox/flox</sup> controls as we have previously described  
178 [61]. In brief, surgery was performed using a dissecting surgical microscope.  
179 Temperature was maintained at 36.5–37.5 °C by using a thermostatic blanket (Harvard  
180 Apparatus, CMA 450 Animal Temperature Controller) throughout the procedure. Mice  
181 were anesthetized with isoflurane inhalation delivered by facemask with O<sub>2</sub>. A 15 mm  
182 midline vertical incision was made on the skin in the head. The head was fixed in  
183 stereotactic frame and cerebral blood flow was measured by Laser-speckle imager  
184 (PeriCam PSI system, Perimed, Sweden). During surgery, mice were in supine position.  
185 A 10 mm midline vertical incision was made on the skin in the neck. The common  
186 carotid, external carotid and internal arteries were dissected from the adjacent tissue.

187 The superior thyroid artery and the occipital artery were cauterized and cut. The external  
188 carotid artery was sutured with a dead knot and cauterized above the suture. A second  
189 suture loop was also placed in the external carotid artery just before the bifurcation of  
190 the common carotid artery. A slit-knot was placed around the common carotid artery. A  
191 small clip was applied to the internal carotid artery and the slip-knot around the common  
192 carotid artery was tightened temporarily. A small incision was made in the external  
193 carotid artery stump. A 5-0 monofilament with a modified tip (0.3 mm x 0.3 mm or 0.3  
194 mm x 1.7 mm) was inserted into the incision and the knot around the external carotid  
195 artery was tightened to prevent bleeding. Then, the monofilament was advanced to the  
196 common carotid artery, the small clip on the internal carotid artery was removed and the  
197 monofilament was guided through the external carotid artery to the internal carotid  
198 artery. The knot around the common carotid artery was opened again and the  
199 monofilament was introduced to the bifurcation of the internal carotid artery. The  
200 monofilament was gently pushed ~1 mm further and then withdrawn to the external  
201 carotid artery. The knot around the external carotid artery was loosen and the  
202 monofilament was slowly removed. The external carotid artery was quickly ligated to  
203 prevent bleeding. The mouse was turned in prone position and induction of  
204 subarachnoid hemorrhage was confirmed by reduction of cerebral blood flow by Laser-  
205 speckle contrast imager. After the surgery, all animals were maintained in a small animal  
206 heated recovery chamber. Two different severities of SAH models were created by  
207 changing the tip shapes of a 5-0 monofilament: a rounded tip 0.3mm (width) x 0.3 mm  
208 (length) was used for mild SAH model or a tip 0.3 mm (width) x 1.7 mm (length) for  
209 severe SAH model. The surgeon and the investigator conducting the analysis were  
210 blinded to the genotype of the mice. Animals which did not exhibit a reduction in CBF  
211 upon endovascular rupture were excluded from the study.

212 **RNA isolation, reverse transcription and quantitative PCR analysis (RT-qPCR)**



213 Total RNA from mouse brain, cells and microvessels was prepared using RNeasy Mini  
214 Kit (Qiagen, Valencia, CA) as instructed by the manufacturer. To generate cDNA, 100 ng  
215 of RNA was reverse transcribed using random primers and SuperScript II RT-  
216 polymerase (Invitrogen, Carlsbad, CA). Primers were designed using the Primer Express  
217 oligo design program software (Applied Biosystems, Foster City, CA). Real-time  
218 quantitative PCR was performed using the SYBR Green I assay on the ABI 7500  
219 Sequence Detection System (Applied Biosystems). PCR reactions for each cDNA  
220 sample were performed in duplicate and copy numbers were calculated using standard  
221 curves generated from a master template as we previously described. The sequence of  
222 the primers used for qPCR are shown in Table 2.

### 223 **S1PR1 Immunohistochemistry**

224 Human tissues were retrieved from Brigham and Women's Department of Pathology  
225 archives; this work was approved by the Institutional Review Board (Protocol  
226 #2013P001431).

227 Immunohistochemistry for S1PR1 was performed on an automated stainer (Leica Bond  
228 III, Leica Biosystems, Buffalo Grove, IL) using an anti-human S1PR1 rabbit polyclonal  
229 antibody (Santa Cruz Biotechnology Inc.) at a final concentration of 1.3 ug/ml. The IHC  
230 technique for S1PR1 was validated as we have previously described [62]. 5µm formalin  
231 fixed paraffin embedded tissue sections of human frontal cortex were deparaffinized and  
232 processed using heat induced epitope retrieval with an EDTA-based buffer (Leica  
233 #AR9640) for 20 minutes and incubated with primary antibody for 30 minutes at room  
234 temperature. Secondary antibody (polymer) incubation (10 minutes) and  
235 diaminobenzidine-based signal generation (10 minutes) were performed per  
236 manufacturer's instructions (Leica # DS9800). Pictures were taken using SPOT Insight  
237 Gigabit camera and SPOT Imaging Software (5.1).

### 238 **Immunofluorescence staining**

239 Under deep anesthesia, mice were perfused with cold PBS and subsequently with 4%  
240 PFA in PBS solution. The brains were removed, postfixed with 4% PFA for 24 h,  
241 transferred to 30% sucrose solution in PBS, embedded in OCT media and frozen.  
242 Coronal sections were cut (9  $\mu\text{m}$ ) in a cryostat. Sections were washed three times with  
243 PBS and were then blocked with blocking solution (5 % bovine serum albumin, 0.8 %  
244 skim milk, and 0.3 % Triton X-100 in TBS) for 1 h and incubated with the specified  
245 primary antibodies in blocking solution overnight on a shaker at 4 °C, followed by the  
246 appropriate secondary antibodies and 4',6-diamidino-2-phenylindole (DAPI) for 1 hours  
247 at room temperature and were mounted onto slides. Samples were observed on an  
248 FluoView FV10i confocal microscope (Olympus, Japan) (original magnification, x 60).

249

250 **Protein extraction from brain microvessels and western blotting.** Brain  
251 microvascular fragments were lysed in HEPES-RIPA buffer (50 mM HEPES pH 7.5; 1%  
252 Triton; 0.5% sodium deoxycholate; 0.1% SDS; 500 mM NaCl; 10 mM MgCl<sub>2</sub>; 50 mM  $\beta$ -  
253 glycerophosphate) with 1x Protease inhibitor cocktail (CalBiochem), 1 mM Na<sub>3</sub>VO<sub>4</sub> and  
254 1 mM NaF and centrifuged at 15,000 r min<sup>-1</sup> for 15 min. Equal amount of proteins were  
255 mixed with SDS sample buffer, boiled and separated on a 4-15% polyacrylamide gel  
256 (Bio-Rad), transferred to PVDF membranes (Millipore Sigma), and blocked 5 % milk in  
257 0.1% Tween-20 in TBS. Immunoblot analysis was performed with S1PR1 (1:250; Santa  
258 Cruz, cat. no. sc25489), p-MLC (1:1000; Cell Signaling, cat. no. 3671), and  $\beta$ -actin  
259 (1:1,000; Santa Cruz, cat. no. sc-1616 HRP) antibodies. Membranes were washed with  
260 0.1% Tween-20 in TBS, incubated with anti-rabbit IgG secondary antibody conjugated to  
261 horseradish peroxidase (1:2,000; Cell Signaling), and protein bands were visualized with  
262 enhanced chemiluminescent (ECL) reagent (Thermo Fisher Scientific) on a Protec  
263 OPTIMAX X-Ray Film Processor. Relative band intensities were obtained by  
264 densitometric analysis of images using ImageJ software.

265 **Brain endothelial cell isolation and assessment of deletion efficiency of**  
266 **endothelial *S1pr1* mRNA.** Two weeks after tamoxifen treatment, mice were sacrificed  
267 and the brains were collected and rinsed in MCDB131 medium (Thermo Fisher  
268 Scientific) with 0.5% fatty acid-free BSA (Millipore Sigma). The cortices were  
269 homogenized in MCDB131 medium using a 7-mL loose-fit Dounce tissue grinder  
270 (Sigma-Aldrich) with 15 strokes. The homogenate was mixed with same amount of 30%  
271 dextran (molecular weight ~70,000 Da, Sigma-Aldrich) in PBS and centrifuged at 4,500 r  
272 min<sup>-1</sup> for 15 min at 4 °C. The pellet was resuspended in MCD131 medium and  
273 centrifuged at 2,400 r min<sup>-1</sup> for 10 min. The pellet was resuspended in Liberase TM  
274 solution (3.5 U; Roche) with DNaseI (0.4 U; AppliChem Inc) and digested at 37.0 °C for  
275 90 min. The enzymatic reaction was stopped by adding 2 mM of EDTA and 2% of BSA.  
276 After centrifugation at 2,400 r min<sup>-1</sup> for 10 min, the pellet was incubated in purified Rat  
277 Anti-Mouse CD31 antibody (MEC13.3) (1 : 100; BD Biosciences) with Dynabeads Sheep  
278 Anti-Rat IgG (Invitrogen, cat. no. 11035) for 35 min. CD31 positive endothelial cells were  
279 isolated by using DynaMag-2 Magnet (Thermo Fisher Scientific). Total RNA was  
280 extracted from the isolated endothelial cells using shredder (Qiagen) and RNeasy Mini  
281 Kit (Qiagen) with RNase-free DNase treatment (Qiagen) according to the manufacturer's  
282 instructions. Reverse transcription was carried out using Verso cDNA Synthesis Kit  
283 (Thermo Fisher Scientific). Real-time PCR was performed on a real-time PCR system  
284 (Applied Biosystems, ABI 7500 Fast) by using PerfeCTa SYBR Green Fast Mix Low  
285 ROX. PCR primer sequences for target molecules are in Table 2.

286 **Grading system for SAH.** Blood volume in the subarachnoid space was assessed  
287 using the grading system previously reported [63]. Mice were sacrificed under deep  
288 anesthesia 24 h after SAH induction and the brains were removed. Pictures of ventral  
289 surface of the brain depicting the basal cistern with the circle of Willis and the basilar  
290 artery were taken using a stereomicroscope (Olympus, SZX16) equipped with digital

291 camera (Olympus, DP12). The basal cistern was divided into 6 segments and a grade  
292 from 0 to 3 was given to each segment: Grade 0, no subarachnoid blood; Grade 1,  
293 minimal subarachnoid blood; Grade 2, moderate blood clot with recognizable arteries;  
294 Grade 3, blood blot obliterating all arteries. Blood volume was evaluated by a total score  
295 ranging from 0 to 18 from six segments.

296 **Tail bleeding assay.** Tail bleeding time was determined as described previously[64]. A  
297 mouse was anesthetized with a mixture of ketamine and xylazine, and body weight was  
298 measured. The mouse was placed on a heating pad in prone position, the tail tip was  
299 about 4 cm below the body horizon. A distal 5 mm segment of the tail was amputated,  
300 and the tail was immediately immersed in PBS pre-warmed at 37 °C. The time to  
301 complete arrest of bleeding was determined: complete arrest is no blood flow for 1  
302 minute. The blood volume was determined by hemoglobin assay. Blood cells were  
303 separated by centrifuge at 4,000 r/min for 5 min at room temperature, and erythrocytes  
304 were resuspended in BD Pharm Lyse (BD Biosciences). After 10 min incubation in the  
305 buffer, the lysate was centrifuged at 10,000 rpm/min for 5 min. Hemoglobin  
306 concentrations were measured spectrophotometrically at 550 nm using a plate reader  
307 (Molecular Devices, SpectraMax M2e).

308 **Mortality and neurological outcome.** Mortality was assessed at 24, 48 and 72 hours  
309 after SAH induction. Gross neurological outcome was blindly evaluated before and at 24,  
310 48 and 72 hours after surgery by sensorimotor scoring as described previously [65, 66].  
311 Briefly, a motor score (0 to 12; spontaneous activity, limb symmetry, climbing, and  
312 balance) and a sensory score were used. Gross neurological outcome was evaluated by  
313 a total score of 4 to 24. Higher scores indicate better neurological outcome.

314 **Brain water content.** Brain edema was determined by using the wet/dry method as  
315 previously described [67]. Mice were sacrificed at 72 hours after surgery and the brains  
316 were quickly removed and separated into the left and right cerebral hemispheres and

317 weighed (wet weight). The brain specimens were dried in an oven at 55°C for 72 hours  
318 and weighed again (dry weight). The percentage of water content was calculated as  
319  $[(\text{wet weight} - \text{dry weight}) / \text{wet weight}] \times 100\%$ .

320 **Cell death detection.** DNA strand breakage during apoptosis after SAH was assessed  
321 by phospho-histon H2A.X (Ser 139) immunofluorescence as previously described [68].  
322 Because phosphorylation of histone H2A.X at Ser 139 ( $\gamma$ -H2AX) is abundant, fast, and  
323 correlates well with each DNA strand breakage, it is the most sensitive marker that can  
324 be used to examine the DNA damage [69, 70]. Mice were deeply anesthetized and  
325 perfused with cold PBS and subsequently with 4% PFA in PBS solution. The brains were  
326 removed, post-fixed with 4% PFA for 24 h and transferred to 30% sucrose solution.  
327 Frozen brains were cut with a 10  $\mu\text{m}$  of thickness by a cryostat (Leica, CM3050 S). The  
328 brain slices were blocked with TBS- blocking solution (5% bovine serum albumin and  
329 0.5% Tween 20 in PBS) for 1 hour at room temperature and incubated with phospho-  
330 histone H2A.X (Ser 139) (20E3) antibody (1:100; Cell Signaling) in blocking solution  
331 overnight on a shaker at 4 °C. Sections were washed three times with 0.5% Tween 20 in  
332 PBS and then incubated with goat anti- rabbit IgG Alexa- 488 (1:200; Life Technologies,  
333 cat. no. A-11008). DAPI (40 ,6-diamidino-2-phenylindole) staining was used as a counter  
334 staining. Sections were imaged by using an FluoView FV10i confocal microscope  
335 (Olympus, Japan) (original magnification, x 40). For quantification, the percentage of  
336 phospho-histone H2A.X positive cells per DAPI positive cells from three different fields in  
337 the ipsilateral cerebral cortex area per mouse (bregma -1.64 to -1.28 mm) were counted  
338 and the average values were plotted.

339 **Assessment of blood brain barrier dysfunction.**

340 To assess albumin extravasation, Evans blue dye (EBD) was used because EBD binds  
341 to plasma albumin[71]. Mice were anesthetized and 2% EBD (4 ml  $\text{kg}^{-1}$ ) was injected in  
342 the external jugular vein 21 hours after surgery. After 3 hours circulation, mice were

343 deeply anesthetized and perfused with cold PBS to remove intravascular dye. The  
344 ipsilateral hemispheres were removed and homogenized in 50% trichloroacetic acid in  
345 PBS. The lysate was centrifuged at 15,000 rpm min<sup>-1</sup> twice for 15 min at 4 °C, and the  
346 supernatant was used to measure fluorescence (excitation/ emission = 620/680 nm,  
347 SpectraMax M2e, Molecular Devices). The relative fluorescence units (R.F.U.) were  
348 normalized by the brain weights. To histologically confirm the plasma leakage into the  
349 brain parenchyma, 70 kDa dextran-TMR was injected through jugular vein and let  
350 circulate for 1h. Brain was removed without perfusion, embedded OCT compound  
351 directly and frozen [72]. Sections were cut (9 µm) in a cryostat and fixed with 4% PFA  
352 before Immunohistochemistry. After staining with anti Glut-1 antibody, the ipsilateral  
353 cortex was observed on an FluoView FV10i confocal microscope (Olympus, Japan)  
354 (original magnification, x 60).

355 **Statistical analysis.** All results were expressed as mean ± SEM. Statistical analysis  
356 were performed with GraphPad Prism (GraphPad Software, Version 7.0c) by using two-  
357 tailed Student's t-test, one-way analysis of variance (ANOVA) followed by Tukey's test or  
358 two-way ANOVA followed by Bonferoni's test. *P* values < 0.05 were considered  
359 statistically significant.

360

## 361 RESULTS

### 362 Expression of S1PR1 in the mouse and human brain

363 We first investigated the expression of S1PR in brain, mouse primary neurons and  
364 mouse brain endothelial cells by reverse transcription and quantitative PCR analysis  
365 (RT-qPCR), as we have previously described [62, 73]. We found that S1PR1 is robustly  
366 expressed, being the most abundant S1PR transcript in the mouse brain *in vivo*, (Fig.  
367 1A,  $20.5 \pm 2.4$  copies/ $10^6$  18S, which is equivalent to approximately  $20.5 \pm 2.4$  S1PR1  
368 mRNA copies/cell [74]), as well as in the mouse brain endothelial cell line bEnd.3 [75]  
369 (Fig. 1B,  $87.3 \pm 2.9$  copies/cell), mouse primary neurons (Fig. 1C,  $16.4 \pm 1.3$  copies/cell)  
370 and mouse primary mixed glial cells (Fig. 1D,  $8.3 \pm 0.15$  copies/cell) *in vitro*. Then, we  
371 compared the expression of S1PR1 in cortical microvessels fragments [56] to its  
372 expression in total brain. Interestingly, we found that S1PR1 transcripts are highly  
373 enriched in cortical microvessels when compared to total brain (Fig. 1E, ~6 fold  
374 enrichment in microvessels vs whole brain).

375 Using the S1pr1-eGFP knock in mice, in which S1PR1-eGFP fusion protein is  
376 expressed under the control of the endogenous S1PR1 promoter [58], we found that  
377 S1PR1 is abundantly expressed in the endothelium of cerebral microvessels throughout  
378 the brain (Fig. 2A, B, representative pictures from corpus callosum and cortex) as  
379 assessed by detection of S1PR1-eGFP and immunofluorescence (IF) analysis for the  
380 glucose transporter 1 (Glut-1).

381 S1PR1 is also expressed in neurons in various anatomical areas, mainly in the neuropil,  
382 as assessed by Nissl and microtubule associated protein (MAP)-2 staining.  
383 Representative pictures of cortex and hippocampus are shown (Supplementary Figures  
384 1 and 2, A and B). In white matter areas (e.g. corpus callosum and internal capsule,  
385 supplementary figures 1C and 2C, D), S1PR1-eGFP is localized mainly in the neuronal

386 processes, surrounding MAP2 signal. Only some fibrous astrocytes express S1PR1  
387 (Supplementary Figure 3).

388 A similar pattern of expression was observed in the mouse brain when  
389 immunofluorescence analysis was conducted using a S1PR1 antibody previously  
390 validated in our laboratory [62] (data not shown).

391 In order to investigate the expression of S1PR1 in the human brain, we conducted IHC  
392 analysis in sections from the frontal lobe. The S1PR1 antibody and IHC protocol used in  
393 human samples were previously validated in our laboratory [62]. Representative pictures  
394 of the frontal cortex are shown in Figure 3. S1PR1 immuno positivity was observed both  
395 in the grey matter (GM) and subcortical white matter (WM) areas (Figure 3A, low  
396 magnification). S1PR1 was widely detected in the cerebrovascular endothelium of  
397 parenchymal vessels (in the grey matter and white matter, Fig. 3B, D-F) and pial vessels  
398 (Fig. 3C). In the grey matter, S1PR1 staining was observed mainly in the neuropil (Fig.  
399 3B, C). In the subcortical white matter, the detection of S1PR1 was more diffuse and  
400 weaker compared to the signal observed in the microvessels (Figure 3E and F).

401 Altogether, our data indicate that, S1PR1 is the most abundant S1PR transcript in the  
402 brain, and in brain endothelial cells, neurons and mixed glial cells *in vitro*. S1PR1 protein  
403 is also widely detected in the mouse and human brain, in the cerebrovascular  
404 endothelium and the grey matter neuropil. S1PR1 mRNA is highly enriched in mouse  
405 cerebral microvessels when compared to total brain.

#### 406 **Endothelial S1PR1 is an endogenous protective pathway induced in cerebral** 407 **microvessels after SAH**

408 In order to investigate the role of endothelial S1PR1 signaling in the pathophysiology of  
409 aneurysmal SAH, we used the endovascular rupture model of SAH[61], which is a well  
410 established and reproducible model that recapitulates key features of the  
411 pathophysiology of the acute phase of SAH. 24, 48 and 72 hours after SAH, cerebral



412 microvessels were isolated from the mouse cortex of wild type mice to determine  
413 sphingosine 1-phosphate receptor 1 (S1PR1) mRNA and protein levels compared to  
414 sham mice. We found that S1PR1 mRNA levels in cortical microvessels were  
415 significantly increased at 24h after SAH ( $3.14 \pm 0.55$  fold induction) compared to sham  
416 (Fig. 4A). Gfap mRNA levels in microvessels were significantly higher 24 h after SAH  
417 compared to sham (Fig. 4B,  $5.14 \pm 0.55$  fold induction). The levels of endothelial (Tjp-1,  
418 Fig. 4C), pericyte (Anpep, CD13, Fig. 4D) or astrocyte end foot (Aqp4, Fig. 4E) markers  
419 did not significantly change suggesting similar cell composition among the microvessel  
420 preparations from these groups of mice. S1PR1 protein was widely detected by western  
421 blot assay in cerebral microvessels in sham animals (Supplementary Figure 4). A  
422 modest increase in S1PR1 protein levels at 24 hours after SAH was observed ( $1.68 \pm$   
423  $0.19$ -fold). These data indicate that, in the acute phase of SAH, neurovascular  
424 inflammation occurs. In addition, S1PR1 mRNA and protein levels in cerebral  
425 microvessels were significantly increased upon SAH.

426 Given the abundant expression of S1PR1 in the cerebrovascular endothelium in the  
427 mouse and human brain, and the enrichment in S1PR1 mRNA in mouse cortical  
428 microvessels compared to total brain, we aimed to investigate the role of endothelial  
429 S1PR1 signaling in early brain injury (EBI) after SAH. We generated endothelial-specific  
430 S1PR1 null mice (S1PR1<sup>iECKO</sup>) by treating adult *S1pr1<sup>flox/flox</sup>xCdh5-Cre<sup>ERT2</sup>* mice (~2  
431 month old) with 75 mg kg<sup>-1</sup> tamoxifen for 3 consecutive days (Fig.4F) as we have  
432 recently described[56]. *S1pr1<sup>flox/flox</sup>* littermate mice were also treated with tamoxifen and  
433 used as wild type control. We assessed the efficiency of deletion in S1PR1<sup>iECKO</sup> by  
434 isolating brain endothelial cells from mice 2 weeks after tamoxifen treatment. RT-qPCR  
435 analysis demonstrated ~90% reduction of *S1pr1* expression in *S1pr1<sup>iECKO</sup>* mice  
436 compared to *S1pr1<sup>flox/flox</sup>* littermate mice treated with tamoxifen in the same manner (Fig.  
437 4F). We previously reported that, in resting conditions, postnatal endothelial deletion of

438 S1PR1 does not have an impact on central nervous system vascular development,  
439 maturation, or pattern formation [56].

440 *S1pr1<sup>iECKO</sup>* and *S1pr1<sup>flox/flox</sup>* littermates were subjected to SAH surgery using a modified  
441 5.0 suture (0.3 mm x 1.7 mm) to induce severe SAH as described in the method section  
442 [61]. The mortality rates were 10% in *S1pr1<sup>flox/flox</sup>* mice at day 1, 2 and 3 after SAH.  
443 Interestingly, the mortality rates in endothelial-specific S1PR1 null mice (*S1pr1<sup>iECKO</sup>* ,  
444 40% at day 1, and 60% at day 2 and 3, Fig. 4G) were significantly higher compared to  
445 wild type (*S1pr1<sup>flox/flox</sup>* ,.

446 Given the high mortality rate in *S1pr1<sup>iECKO</sup>* subjected to the severe SAH model (Fig. 4G),  
447 we used a milder SAH model for subsequent studies, by changing the shape of the tip of  
448 the nylon suture to perforate the cerebral artery (0.3 mm x 0.3 mm, as described in  
449 methods section). When *S1pr1<sup>iECKO</sup>* mice were challenged with mild SAH, they exhibited  
450 a trend towards a higher mortality rate (26.3% in day 1, 2 and 3) compared to  
451 *S1pr1<sup>flox/flox</sup>* , which exhibited a mortality rate of 7.7% at day 1, 2 and 3 (Fig. 4H), although  
452 it was not statistically significant. Altogether these data indicate that endothelial-specific  
453 deletion of S1PR1 in mice increases mortality in the acute phase of SAH.

454 **Genetic deletion of *S1pr1* in the endothelium has no effect on blood volume in the**  
455 **subarachnoid space, hemostasis or CBF changes after SAH.**

456 The volume of blood in the subarachnoid space, which depends on the amount of  
457 bleeding and the clearance, directly correlates with worse outcomes after SAH [76] [63].  
458 Thus, we quantified the amount of subarachnoid blood upon SAH in *S1pr1<sup>flox/flox</sup>* and  
459 *S1pr1<sup>iECKO</sup>* mice by image analysis using a previously described SAH grading system  
460 [63]. No significant differences were observed in the amount of subarachnoid blood  
461 between *S1pr1<sup>flox/flox</sup>* and *S1pr1<sup>iECKO</sup>* mice 24h after SAH (Fig. 5A, representative  
462 pictures). SAH grading was  $11.50 \pm 0.62$  in *S1pr1<sup>flox/flox</sup>* mice and  $11.67 \pm 0.42$  in  
463 *S1pr1<sup>iECKO</sup>* (Fig. 5B). In addition, we determined the role of endothelial-specific S1PR1

464 in hemostasis using the tail bleeding assay [64]. We did not find any significant  
465 differences in the bleeding times or blood volumes between  $S1pr1^{flox/flox}$  and  $S1pr1^{iECKO}$   
466 mice in the tail bleeding assay. Bleeding times were  $68.88 \pm 4.98$  seconds in  $S1pr1^{flox/flox}$   
467 and  $63.8 \pm 4.14$  seconds in  $S1pr1^{iECKO}$  (Fig. 5C). Hemoglobin contents, assessed by  
468 measuring the absorbance at 550 nm, were  $0.73 \pm 0.07$  in  $S1pr1^{iECKO}$  mice compared to  
469  $0.70 \pm 0.12$  in  $S1pr1^{flox/flox}$  mice (Fig. 5D). Altogether, these data indicate that hemostasis  
470 is not impaired in  $S1pr1^{iECKO}$  mice compared to wild type mice and that the amount of  
471 blood in the subarachnoid space 24 h upon SAH is similar in wild type and  $S1pr1^{iECKO}$   
472 mice.

473 We also determined cerebral blood flow (CBF) changes during SAH in both groups of  
474 mice by Laser-Speckle flowmetry (Figure 5E). CBF in the middle cerebral artery (MCA)  
475 territory rapidly dropped ~1 minute after SAH in a similar way in both  $S1pr1^{flox/flox}$  and  
476  $S1pr1^{iECKO}$  mice. In the ipsilateral hemisphere, CBF dropped to  $40.26 \pm 4.09\%$  of basal in  
477  $S1pr1^{flox/flox}$  and to  $31.65 \pm 3.46\%$  of basal in  $S1pr1^{iECKO}$ ; in the contralateral hemisphere,  
478 CBF dropped to  $77.32 \pm 3.90\%$  of basal in  $S1pr1^{flox/flox}$  and to  $82.42 \pm 3.72\%$  of basal in  
479  $S1pr1^{iECKO}$ . Afterwards, as shown in Figure 5E, CBF progressively recovered similarly in  
480  $S1pr1^{flox/flox}$  and  $S1pr1^{iECKO}$  mice. 2 h after SAH, in the ipsilateral hemisphere, CBF  
481 recovered to  $82.83 \pm 5.88\%$  of basal in  $S1pr1^{flox/flox}$  and to  $87.46 \pm 7.15\%$  of basal in  
482  $S1pr1^{iECKO}$ ; in the contralateral side CBF recovered to  $95.34 \pm 4.86\%$  of basal in  
483  $S1pr1^{flox/flox}$  and to  $102.81 \pm 1.97\%$  of basal in  $S1pr1^{iECKO}$ . These data indicate that  
484 genetic deletion of  $S1pr1$  in the endothelium did not have a significant impact in CBF  
485 changes upon SAH.

486 Finally, no significant differences were observed in arterial  $O_2$  saturation, heart rate,  
487 pulse distention (a surrogate of pulse pressure) and respiratory rate between  $S1pr1^{iECKO}$   
488 and  $S1pr1^{flox/flox}$  mice, before or after SAH (Table 1).

489           Altogether, these data indicate that endothelial-specific deletion of S1PR1 in  
490 adult mice did not have a significant impact on bleeding or clearance of subarachnoid  
491 blood, cerebral blood flow changes or systemic physiological parameters such as heart  
492 rate, respiratory rate, O<sub>2</sub> saturation or pulse distension.

493 **Endothelial deletion of *S1pr1* exacerbates brain edema and cell death after SAH**  
494 **leading to worsened neurological outcomes.**

495 In order to determine the impact of the lack of endothelial S1PR1 signaling on brain injury  
496 after SAH, we assessed brain edema at 72 hours after induction of mild SAH by  
497 quantifying total brain water content. *S1pr1<sup>flox/flox</sup>* mice exhibited a statistically significant  
498 increase in brain water content in the ipsilateral hemisphere ( $82.83 \pm 0.53\%$ ) compared  
499 to sham ( $81.34 \pm 0.20\%$ ) (Fig. 6A). Interestingly, in *S1pr1<sup>iECKO</sup>* mice, total brain edema in  
500 the ipsilateral hemisphere was significantly exacerbated ( $84.39 \pm 0.91\%$ ) compared to  
501 *S1pr1<sup>flox/flox</sup>* (Fig. 6A). There were no changes in brain water content in contralateral  
502 hemisphere (SAH versus sham) in either *S1pr1<sup>flox/flox</sup>* or *S1pr1<sup>iECKO</sup>* mice.

503           Next, we analyzed cell death at 24 hours after SAH using phospho-histone  
504 H2A.X (Ser 139) immunostaining, a marker for apoptosis and DNA damage [69, 70]. We  
505 found that *S1pr1<sup>iECKO</sup>* mice showed significantly higher number of phospho-histone  
506 H2A.X positive cells compared to *S1pr1<sup>flox/flox</sup>* mice ( $50.85 \pm 2.56\%$  in *S1pr1<sup>iECKO</sup>* versus  
507  $34.00 \pm 2.98\%$  in *S1pr1<sup>flox/flox</sup>*) (Fig. 6B and C). No apoptotic cells were detected in sham  
508 animals.

509 Finally, we aimed to determine the impact of genetic deletion of S1PR1 in the  
510 endothelium on neurological outcomes after SAH. Neurological outcomes were  
511 determined by assessing motor and sensory function using a total scale of 4 to 24 (being  
512 24 the best neurological outcome) as previously described[65, 66]. Neurological  
513 outcomes at 24h and 48h after mild SAH surgery were worsened in *S1pr1<sup>iECKO</sup>* mice

514 (16.29 ± 1.37 and 17.14 ± 1.40, respectively) compared to *S1pr1<sup>flox/flox</sup>* mice (20.91 ±  
515 0.81 and 21.00 ± 0.83, respectively) (Fig. 6D).

516 These data indicate that genetic deletion of *S1pr1* specifically in the endothelium  
517 significantly exacerbates total brain edema and cell death resulting in poorer  
518 neurological outcomes.

519 **Endothelial specific deletion of *S1pr1* in adult mice exacerbates blood brain**  
520 **dysfunction after SAH.**

521 Given the critical role of the cerebrovascular endothelium in BBB maintenance, we  
522 determined BBB dysfunction 24 hours after SAH or sham surgery. Albumin leakage was  
523 quantified by Evans Blue Dye (EBD) extravasation assay, in *S1pr1<sup>flox/flox</sup>* and *S1pr1<sup>iECKO</sup>*  
524 mice. In addition, leakage of macromolecules into the brain parenchyma was  
525 histologically confirmed by detection of intravenously injected 70kDa  
526 tetramethylrhodamine (TMR)-dextran and immunofluorescence analysis of the  
527 endothelial marker Glut-1. We found that 24 h after SAH, albumin leakage in the  
528 ipsilateral hemisphere was significantly increased in *S1pr1<sup>flox/flox</sup>* mice compared to sham  
529 animals (Fig 7A, 1.53 ± 0.06 fold in *S1pr1<sup>flox/flox</sup>* SAH versus *S1pr1<sup>flox/flox</sup>* sham) and  
530 significantly higher in *S1pr1<sup>iECKO</sup>* mice with regards to *S1pr1<sup>flox/flox</sup>* (1.83 ± 0.08 in  
531 *S1pr1<sup>iECKO</sup>*, Fig. 7A). In addition, upon sham surgeries, no differences in albumin leakage  
532 were observed between *S1pr1<sup>flox/flox</sup>* and *S1pr1<sup>iECKO</sup>*, consistent with our recent report  
533 [56]. Histological analysis of 70kDa tetramethylrhodamine (TMR)-dextran localization,  
534 confirmed increased leakage into the brain parenchyma and outside of cerebral  
535 capillaries upon SAH (Fig. 7B). Altogether, these data indicate that BBB dysfunction  
536 upon SAH is exacerbated in animals lacking S1PR1 specifically in the endothelium.

537 In order to shed light on the mechanisms whereby endothelial deletion of S1PR1 leads  
538 to exacerbated BBB dysfunction, we isolated cerebral microvessels after SAH from

539 *S1pr1<sup>flox/flox</sup>* *S1pr1<sup>iECKO</sup>* mice and determined the activation of signaling pathways  
540 implicated in BBB dysfunction by western blot analysis. The Rho-ROCK pathway has  
541 been shown to play a critical role in endothelial barrier dysfunction, endothelial  
542 inflammation [77] and also in blood brain barrier dysfunction in central nervous system  
543 pathologies [78-80]. We found that exacerbated BBB dysfunction in endothelial-specific  
544 S1PR1 null mice correlated with increased phosphorylation of myosin light chain (MLC)  
545 in isolated cortical microvessels (Fig. 7C and D,  $6.96 \pm 1.6$  fold in *S1pr1<sup>iECKO</sup>* versus  
546 *S1pr1<sup>flox/flox</sup>*), a downstream effector of the Rho-ROCK pathway critical for the induction  
547 blood brain barrier dysfunction [78]. The levels of endothelial markers (e.g. occludin, Fig.  
548 7C and D) were similar, indicating consistent cell composition between microvessel  
549 preparations [59]. Altogether, these data indicate that BBB dysfunction after SAH  
550 (albumin and 70 KDa dextran leakage) is heightened in mice lacking S1PR1 specifically  
551 in the endothelium and correlates with increased levels of phosphorylated MLC in  
552 cerebral microvessels.  
553  
554

## 555 **DISCUSSION**

556 In this study, we aimed to determine the expression of S1PR1 in the cerebrovascular  
557 endothelium in mice and humans and the role of endothelial S1PR1 signaling in stroke  
558 outcomes in mice. Using tissue specific S1PR1 null mice in which genetic deletion of  
559 S1PR1 in the endothelium was induced in the adult and a mouse model of aneurysmal  
560 SAH, the most devastating type of stroke, we unveil the critical role of this endothelial  
561 pathway in SAH outcomes. We found that S1PR1 transcripts are significantly enriched  
562 (~6 fold) in mouse cortical microvessels compared to total brain and that S1PR1 mRNA  
563 is induced in cerebral microvessels after SAH. Endothelial specific deletion of S1PR1  
564 resulted in aggravated brain injury and significantly worsened outcomes, indicating that  
565 S1PR1 is an endogenous protective mechanism of the endothelium to mitigate  
566 exacerbation of neurovascular injury in stroke. *Our study unveiled a previously*  
567 *unappreciated role of the endothelial S1P pathway in the pathophysiology of stroke and*  
568 *implies that activation of this endogenous protective endothelial pathway could have*  
569 *important therapeutic applications in CNS pathologies.*

570

571 Cerebral microvascular dysfunction has been implicated in the pathophysiology of  
572 numerous acute [5-13, 81] [82-85], and chronic neurological conditions [86-89].  
573 Aneurysmal SAH, the most devastating type of stroke, occurs when an intracranial  
574 aneurysm ruptures. Compared to other types of stroke, SAH occurs earlier in life (40-60  
575 years)[90] and leads to higher mortality (50%) [91]. In addition, SAH survivors  
576 experience a high degree of disability and cognitive impairment (memory, language and  
577 executive function) [92] with personal and societal consequences. SAH causes transient  
578 cerebral ischemia and accumulation of blood in the subarachnoid space, leading to brain  
579 injury, BBB dysfunction, cytotoxic and vasogenic cerebral edema in the acute phase [12,  
580 93, 94]. Although numerous studies have reported *the direct correlation between*

581 *endothelial barrier dysfunction and worsened SAH outcomes in humans* [95, 96] and  
582 mice [94, 97-102], *the impact of specific endothelial signaling pathways on brain injury*  
583 *and SAH outcomes has remained uncertain*. Given the emerging pathophysiological  
584 relevance in humans of the S1PR1 pathway, in this study, we aimed to investigate the  
585 role of the endothelial-specific S1PR1 signaling in brain injury in the acute phase of  
586 SAH. We used a well-established mouse model of aneurysmal SAH, the endovascular  
587 rupture model [61]. This experimental model faithfully recapitulates key features of the  
588 acute phase of SAH: upon rupture of the MCA, blood pours into the subarachnoid space,  
589 increasing intracranial pressure which gives rise to a brief period of transient (~3-5  
590 minutes) cerebral ischemia [61] (Fig. 5E, ~70% reduction of CBF in ipsilateral  
591 hemisphere). CBF slowly recovers over the time, but the brain remains hypoperfused in  
592 the acute phase of SAH (Fig. 5E, ~30% reduction vs basal). BBB breakdown, cerebral  
593 edema and neuronal injury ensue [97, 100]. *Our study demonstrates the critical role of*  
594 *the endothelium in SAH outcomes and highlights the therapeutic potential of the*  
595 *endothelial S1PR1 pathway to prevent exacerbation of brain injury in this devastating*  
596 *condition*.

597

598 There is mounting evidence in humans of the pathophysiological relevance of the S1P-  
599 S1PR1 pathway in endothelial [31, 32] and lymphocyte function [38, 39] [40]. Fingolimod  
600 [38, 39] and Siponimod [40], 2 immunosuppressor drugs FDA approved for the treatment  
601 of multiple sclerosis, are pharmacological modulators of S1PR1. Remarkably, they are  
602 currently being tested in stroke clinical trials. In experimental stroke, FTY720 and S1PR1  
603 specific agonists, as other immunosuppressor drugs, have been shown to be  
604 protective [45, 46] [47, 48]. Although the mechanisms are not completely clear, FTY720  
605 protection has been attributed to its immunosuppressive effects [48] and its ability to  
606 desensitize and inhibit S1PR1 signaling. *Due to the immuno-suppressor effects of*



607 *S1PR1 pharmacological modulators, these previous studies could not determine the role*  
608 *of endothelial specific S1PR1 signaling in BBB function and stroke outcomes.* We sought  
609 to address this pivotal question by inducing the deletion of S1PR1 in adult mice,  
610 specifically in the endothelium [57] and directly testing the role of endothelial S1PR1  
611 signaling in BBB function and its impact on early brain injury upon SAH. Our data  
612 demonstrate that *endothelial S1P signaling via S1PR1 is an endogenous protective*  
613 *signaling pathway that mitigates neurovascular ischemic-hypoxic injury.* These data are  
614 consistent with previous studies from our laboratory which indicated that FTY720 exerts  
615 agonistic activity for S1PR1 in the endothelium and promotes endothelial barrier function  
616 [17, 27]. Overall, our findings with the endothelial-specific S1PR1 mice highlight the  
617 therapeutic potential of this endothelial pathway in stroke. *Future strategies to activate*  
618 *this pathway specifically in the endothelium without compromising the immune response*  
619 *hold promise as novel vasoprotective therapeutic agents in stroke.*

620

621 Mechanistically, we found that endothelial deletion of S1PR1 exacerbates BBB  
622 dysfunction (albumin and 70kDa dextran leakage) upon SAH. BBB dysfunction  
623 heightens neurovascular injury by various mechanisms such as by allowing the entrance  
624 of neurotoxic plasma components into the brain parenchyma (e.g. albumin [103],  
625 fibrinogen [104]) and by compromising the ability of cerebral capillaries to deliver oxygen  
626 and nutrients to the neurons [7-9, 105]. In homeostatic conditions, the cerebrovascular  
627 endothelium, in cooperation with pericytes and astrocytes maintain a physical, metabolic  
628 and transport barrier to restrict the passage of molecules into the brain parenchyma [4,  
629 106, 107]. Crosstalk between the cellular components of the blood brain barrier are  
630 critical to maintain the unique phenotype of the cerebrovascular endothelium,  
631 characterized by the presence of TJ as well as low expression of molecules involved in  
632 vesicular trafficking (e.g. plasmalemma vesicle-associated protein) [108] [3] [109] and

633 leukocyte adhesion (e.g. ICAM-1), which prevents trafficking of plasma molecules and  
634 blood cells via paracellular and transcellular routes. Upon ischemic or hypoxic injury,  
635 BBB dysfunction ensues, primarily due to two cellular mechanisms, transcellular and  
636 paracellular permeability. Gelatinase activity in cerebral microvessels [94, 100, 101, 110-  
637 113] is induced leading to basal lamina degradation [7, 114], weakening of pericyte-  
638 endothelial interactions and increased endothelial transcytosis (transcellular  
639 permeability)[3, 109]. Intercellular junctions (tight and adherens junctions) [78, 115]  
640 undergo post-translational modifications (e.g. phosphorylation) and disassembly from  
641 the actin cytoskeleton [116] giving rise to increased paracellular permeability. Barrier  
642 dysfunction is also accompanied by the acquisition of the cerebrovascular endothelium  
643 of a pro-inflammatory phenotype, characterized by the expression of leukocyte-  
644 endothelial adhesion molecules (e.g. E-Selectin, ICAM-1). The GTPase Rho, is  
645 emerging as a central key regulator of these cellular processes. Rho, and its effector,  
646 ROCK play a critical role in endothelial dysfunction via the regulation of the actin  
647 cytoskeleton dynamics [78, 80], caveolin-mediated endothelial transcytosis [79, 117] as  
648 well as the induction of pro-inflammatory gene expression via activation of nuclear factor  
649  $\kappa$  B[118, 119]. In the current study we found that, at the molecular level, exacerbated  
650 BBB dysfunction in S1PR1 endothelial specific null mice correlated with increased levels  
651 of phosphorylated MLC, a downstream effector of the Rho-ROCK pathway implicated in  
652 blood brain barrier dysfunction [77, 78, 80]. Altogether, our data indicates that the  
653 aggravation of albumin leakage observed in endothelial specific S1PR1 null mice  
654 correlates with increased activation of Rho-ROCK pathway, implicating the role of  
655 endothelial S1PR1 signaling in the regulation of the endothelial cytoskeleton and  
656 vesicular trafficking leading to barrier dysfunction.

657

658 Other possible vascular mechanisms responsible for the worsened outcomes in

659 endothelial specific S1pr1<sup>iECKO</sup> mice vs wild type could be differences in cerebral blood  
660 flow or in bleeding upon cerebral artery rupture. However, we did not observe  
661 differences in the CBF changes or physiological parameters during and after SAH  
662 between these two groups of mice. In addition, the amount of blood in the subarachnoid  
663 space (SAH grade), which plays an important role in the severity of brain injury and SAH  
664 outcomes was similar in both groups of mice, indicating that there were no differences in  
665 bleeding or the clearance of the subarachnoid blood. Furthermore, there were no  
666 differences in hemostasis, assessed by the tail-bleeding assay, between wild type and  
667 S1pr1<sup>iECKO</sup> mice. Thus, the exacerbation of neuronal injury upon SAH in the  
668 endothelial specific s1pr1 null mice vs wild type cannot be attributed to differences in  
669 bleeding or in cerebral blood flow regulation. Altogether our data points to exacerbation  
670 of BBB permeability (albumin leakage) as the main cellular mechanism underlying the  
671 aggravation of brain injury upon endothelial deletion of S1PR1 in the adult mice,  
672 providing proof of concept of the critical role of endothelium and blood brain barrier  
673 dysfunction in SAH outcomes.

674

675 Lastly, our study also underscores the pathophysiological relevance of the S1P pathway  
676 in humans. Using RT-qPCR in combination with mouse genetic approaches and IHC  
677 techniques previously validated in our laboratory [62], we found that S1PR1 is the most  
678 abundant S1PR transcript in the mouse brain and mouse brain microvessels and widely  
679 detected in the human cerebrovascular endothelium and brain parenchyma. Our human  
680 data, together with our mouse studies using the endothelial-specific S1PR1 null mice,  
681 highlight the therapeutic and prognostic potential of the endothelial S1P pathway in  
682 stroke. Given recent human studies which indicate that S1P-S1PR1 vasoprotective  
683 signaling [28, 30] may be limiting in cardiovascular and inflammatory diseases [17, 31-  
684 34] our present data imply that patients having limiting endothelial S1PR1

685 antiinflammatory signaling (e.g. with lower levels of ApoM or HDL-bound S1P), could be  
686 at risk of worsened outcomes upon stroke. In addition, our data suggests that the  
687 adverse effects reported in some subsets of multiple sclerosis patients in chronic  
688 treatment with FTY720, such as macular edema or posterior reversible encephalopathy  
689 syndrome [120-123] could be due to antagonism of endothelial S1PR1.

690

691 In summary, our study demonstrates the critical role of the endothelial S1PR1 signaling  
692 in BBB function and SAH outcomes in mice. Our human data strengthen the  
693 pathophysiological relevance of these findings and highlight the therapeutic and  
694 prognostic potential of the endothelium, more specifically the endothelial S1P signaling  
695 pathway in stroke. New strategies to modulate S1P signaling specifically in the  
696 endothelium to prevent exacerbation of BBB leakage and brain injury without  
697 compromising the immune response [17, 60, 124] could hold promise as novel  
698 neurovascular protective therapies in stroke and other pathological conditions  
699 associated with BBB dysfunction [5-13, 81-85], [86-89].

700

701 **ACKNOWLEDGEMENTS**

702 This work was supported by internal funds provided by the Departments of Surgery and  
703 Emergency Medicine, BIDMC, the Department of Pathology and Laboratory Medicine,  
704 Weill Cornell Medicine, American Heart Association Grant-in-Aid 12GRNT12050110,  
705 NIH HL094465 and Leducq Foundation grants to TS. AI was partially supported by  
706 LeRoche foundation and the Tri-Institutional Therapeutics Discovery Institute.

707 We would like to thank Dan Li and Dr. Shou-ching Jaminet from the Multi-Gene  
708 Transcriptional Profiling Core Facility (Center for Vascular Biology Research, Beth Israel  
709 Deaconess Medical Center, Harvard Medical School) for the quantitative PCR analysis,  
710 Drs. Louise McCullough (University of Texas Health McGovern Medical School) and Tim  
711 Hla (Boston Children's Hospital) for their input in the project.

712 The authors declare no competing financial interests.  
713

714 **FIGURE LEGENDS**

715 **Figure 1. S1PR1 mRNA is the most abundant S1PR transcript in brain, brain**  
716 **endothelial cells and neurons and it is highly enriched in brain microvessels.**

717 S1PR mRNA levels in A) normal mouse brain, B) the mouse brain endothelial cell line  
718 bEnd.3, C) primary mouse neurons and D) primary mouse mixed glial cells. E)  
719 Comparison of S1PR1 mRNA levels in brain microvessels versus whole brain.  
720 Quantitative reverse transcription and polymerase chain reaction (RT-qPCR)  
721 demonstrates that S1PR1 transcript is predominant over the other S1PR and it is highly  
722 enriched in brain microvessels compared to whole brain. B) Log scale. The individual  
723 values and the mean  $\pm$  SEM are shown. N=3-6. \* $p < 0.05$ .

724 **Figure 2. S1PR1 is expressed in the cerebrovascular endothelium of the mouse**

725 **brain.** Confocal analysis of S1PR1-eGFP fluorescence and Glut-1 immunodetection in  
726 white matter (A, corpus callosum) and grey matter (B, C, cortex) areas of the mouse  
727 brain. S1PR1-eGFP (green channel) is expressed in the cerebrovascular endothelium.  
728 Immunofluorescence for Glut-1 (endothelial marker) is shown in the red channel. C)  
729 Inset shown in panel (digital zoom). Representative pictures are shown. Scale bar 20 $\mu$ m.  
730 N=5-6. Sections were captured using an FluoView FV10i confocal microscope  
731 (Olympus, Japan) (original magnification, x 60). Arrows in the green channel point to  
732 bright green signal in the microvessels (Glut1 positive).

733 **Figure 3. S1PR1 is detected in the human cerebrovascular endothelium.**

734 Representative images of S1PR1 immunohistochemistry from 5 human brain autopsy  
735 samples. Formalin-fixed paraffin-embedded tissue sections were used for  
736 immunohistochemical staining of S1PR1, as described in the Methods section. A)  
737 Expression of S1PR1 in frontal cortex grey matter (GM) and subcortical white matter  
738 (WM). Scale bar 500  $\mu$ M. B) Representative picture showing S1PR1 immunopositivity in

739 arterioles and capillaries as well as the neuropil of the cortical grey matter. C) Detection  
740 of S1PR1 in the cerebrovascular endothelium of pial vessels. D-F) Representative  
741 pictures of S1PR1 immunodetection in the subcortical white matter. Notice S1PR1  
742 positivity in parenchymal arterioles (D, F), venules (E) and capillaries (E, F). B-F) Scale  
743 bar 50  $\mu$ M. Pictures were taken with a 60x objective (Olympus, Japan).

744 **Figure 4. Endothelial S1PR1 is an endogenous protective pathway induced in**  
745 **cerebral microvessels after SAH.** A-E) *S1pr1*, *Gfap*, *Tjp-1* (ZO-1), *Anpep* (CD13) and  
746 *Aqp4* mRNA levels in cerebral microvessels were quantified by RT-qPCR in sham  
747 animals 24 h after SAH. *S1pr1* and *Gfap* are induced in cerebral microvessels after  
748 SAH. The mRNA levels of the endothelial (*ZO-1*, *Tjp-1*), pericyte (*Anpep*, CD13) or  
749 astrocyte (*Aqp4*) markers did not significantly change suggesting similar cell composition  
750 among the microvessel preparations from these groups of mice. F) Efficiency of deletion  
751 of S1PR1 in the cerebrovascular endothelium. *S1pr1<sup>flox/flox</sup>* and *S1pr1<sup>iECKO</sup>* mice were  
752 treated with tamoxifen (75 mg kg<sup>-1</sup>) for the consecutive 3 days at the age of 8 weeks.  
753 *S1pr1* mRNA levels were analyzed by qPCR in brain endothelial cells isolated from  
754 *S1pr1<sup>flox/flox</sup>* and *S1pr1<sup>iECKO</sup>* mice, 2 weeks after tamoxifen treatment ( $n = 4$ ). Efficiency of  
755 deletion in the cerebrovascular endothelium in *S1pr1<sup>iECKO</sup>* mice is shown relative to  
756 *S1pr1<sup>flox/flox</sup>* mice. Individual values and mean  $\pm$  SEM are shown. \* $P < 0.05$ , \*\* $P < 0.01$ ,  
757 \*\*\* $P < 0.001$ , Student's t-test. G) Survival curves in *S1pr1<sup>flox/flox</sup>* and *S1pr1<sup>iECKO</sup>* mice after  
758 severe SAH surgery ( $n = 10$ ). H) Survival curves in *S1pr1<sup>flox/flox</sup>* and *S1pr1<sup>iECKO</sup>* mice after  
759 mild SAH surgery ( $n = 13$  or 19). G and H) Log-rank test, \* $P < 0.05$ . Red line, *S1pr1<sup>iECKO</sup>*;  
760 blue line, *S1pr1<sup>flox/flox</sup>*.

761 **Figure 5. Genetic deletion of *S1pr1* in the endothelium has no effect on**  
762 **subarachnoid blood volume, hemostasis or CBF changes after SAH.**

763 A) Representative images of the ventral side of the brain from *S1pr1<sup>flox/flox</sup>* and *S1pr1<sup>iECKO</sup>*  
764 mice at 24 hours after SAH. B) Subarachnoid blood volume (SAH grade) was calculated

765 by quantifying the blood in the subarachnoid space by image analysis as described in  
766 methods section. ( $n = 6$ ). (C-D) Quantification of hemostasis in the tail bleeding assay.  
767 C) bleeding time and D) blood volume ( $n = 8$ ). (B-D) Student's t-test. Individual values  
768 and mean $\pm$ SEM are shown. (E) CBF in the middle cerebral artery territory was  
769 measured by Laser-speckle contrast imager in  $S1pr1^{flox/flox}$  and  $S1pr1^{iECKO}$  mice before (0  
770 min.), 1 min, 10 min, 2 h, 4 h, 24 h after SAH induction. The relative CBF values (%)  
771 versus before SAH are shown. Data are mean  $\pm$  SEM. ( $n = 6$ ). Two-way ANOVA  
772 followed by Bonferoni's test showed no statistically significant differences between wild  
773 type and  $S1PR1^{iECKO}$ . Red solid line,  $S1PR1^{flox/flox}$  ipsilateral side; blue solid,  $S1PR1^{iECKO}$   
774 ipsilateral; light dotted line,  $S1PR1^{flox/flox}$  contralateral; light blue dotted line,  $S1PR1^{iECKO}$   
775 contralateral. IL, ipsilateral side. CL, contralateral side.

776

777 **Figure 6. Exacerbated cerebral edema and neuronal injury after SAH in endothelial**  
778 **specific S1pr1 null mice** A) 72 hours after SAH, brain edema was evaluated by  
779 quantification of brain water content in  $S1pr1^{flox/flox}$  and  $S1pr1^{iECKO}$  mice ( $n = 7 - 14$ ). Brain  
780 water content in the ipsilateral and contralateral hemispheres was calculated as ((wet  
781 weight-dry weight)/wet weight) x 100. \*  $p < 0.05$ , one-way ANOVA followed by Tukey's  
782 test. B) Immunofluorescence confocal analysis of phospho-histone H2A.X, a marker for  
783 DNA damage (green channel). Nuclear staining (DAPI) is shown in the blue channel.  
784 Representative images of ipsilateral hemisphere (cortex) from  $S1pr1^{flox/flox}$  and  $S1pr1^{iECKO}$   
785 mice after SAH stained are shown. Scale bar, 50  $\mu$ m. C) Quantification of phospho-  
786 histone H2A.X positive cells (%) ( $n = 7-8$  mice). \*  $P < 0.05$ , student's t-test. The individual  
787 values and the mean  $\pm$  SEM are shown. Each data point represents a mouse and it is  
788 the average of 3 different fields. D) Neurological (sensory and motor) deficits after mild  
789 SAH surgery in  $S1pr1^{flox/flox}$  and  $S1pr1^{iECKO}$  mice ( $n = 12$  or 14) were assessed as  
790 described in methods. From 4 to 24 points: 24 points (best), 4 points (worst). Data are



791 mean  $\pm$  SEM. \* $P$  < 0.05, \*\* $P$  < 0.01, One-way ANOVA followed by Tukey's test. Red  
792 line,  $S1pr1^{iECKO}$ ; Blue line,  $S1pr1^{flox/flox}$ .

793 **Figure 7. Endothelial specific  $S1pr1$  null mice exhibit exacerbated BBB leakage**  
794 **after SAH compared to wild type littermates.** A) Albumin BBB leakage, assessed by  
795 Evans Blue Dye extravasation, 24 hours after sham or SAH surgery in  $S1pr1^{flox/flox}$  and  
796  $S1pr1^{iECKO}$  mice ( $n = 6 - 10$ ). Evans blue dye was circulating for 3 hours. The individual  
797 values and mean  $\pm$  SEM are shown. \* $P$  < 0.05, \*\* $P$  < 0.01, \*\*\* $P$  < 0.001, \*\*\*\* $P$  < 0.0001  
798 (One-way ANOVA followed by Tukey's test).  $y$  axis shows relative fluorescence units  
799 (R.F.U.) per gram of tissue. B) Histological determination of 70kDa of TMR-dextran  
800 leakage (red channel) into the brain parenchyma. Immunofluorescence for Glut-1  
801 (endothelial marker) is shown in the green channel. Nuclear stain (DAPI) is shown in the  
802 blue channel. White arrows point to extravascular-parenchymal TMR-dextran.  
803 Representative pictures are shown. Scale bar 20 $\mu$ m. N=5-6. Sections were captured  
804 using an FluoView FV10i confocal microscope and a 60x objective (Olympus, Japan). C-  
805 D) Increased levels of phosphorylated myosin light chain (p-MLC) in isolated cortical  
806 microvessels in  $S1pr1^{iECKO}$  mice compared to  $S1pr1^{flox/flox}$ . Cortical microvessels were  
807 isolated 24 h after SAH in  $S1pr1^{iECKO}$  and  $S1pr1^{flox/flox}$  mice. C) Western blot analysis for  
808 phospho-MLC (p-MLC), occludin and  $\beta$ -actin. D) Western blot quantification was  
809 conducted using Image J. Individual values and mean  $\pm$  SEM are shown. \* $P$  < 0.05 (  $t$   
810 test).

811

812

**Table 1. Physiological variables in *S1pr1<sup>flox/flox</sup>* and *S1pr1<sup>iECKO</sup>* mice.**

| Time points      | Parameters                                                | <i>S1pr1<sup>flox/flox</sup></i>                          | <i>S1pr1<sup>iECKO</sup></i> |
|------------------|-----------------------------------------------------------|-----------------------------------------------------------|------------------------------|
| 5 min before SAH | Arterial O <sub>2</sub> saturation (SpO <sub>2</sub> , %) | 98.6 ± 0.2                                                | 98.4 ± 0.1                   |
|                  | Heart rate (b.p.m.)                                       | 442.0 ± 23.2                                              | 459.2 ± 10.7                 |
|                  | Pulse distention (μm)                                     | 13.8 ± 0.7                                                | 12.8 ± 0.9                   |
|                  | Respiratory rate (br.p.m.)                                | 162.3 ± 4.9                                               | 155.0 ± 6.7                  |
|                  | 5 min after SAH                                           | Arterial O <sub>2</sub> saturation (SpO <sub>2</sub> , %) | 98.6 ± 0.1                   |
|                  | Heart rate (b.p.m.)                                       | 539.8 ± 9.9                                               | 549.7 ± 9.9                  |
|                  | Pulse distention (μm)                                     | 13.2 ± 1.1                                                | 12.5 ± 0.9                   |
|                  | Respiratory rate (br.p.m.)                                | 133.3 ± 4.4                                               | 126.8 ± 6.5                  |

bpm, beats per minute; br.p.m., breaths per minute. Pulse distention is a surrogate for pulse pressure. No significant differences were observed in the physiological parameters (arterial O<sub>2</sub> saturation, heart rate, pulse distention and respiratory rate) between *S1pr1<sup>flox/flox</sup>* and *S1pr1<sup>iECKO</sup>* mice, before and after SAH

813

814

815 **SUPPLEMENTARY FIGURE LEGENDS**

816 **Supplementary Figure 1. Expression of S1PR1-eGFP and Nissl stain in brain in the**  
817 **S1PR1-eGFP knock in mouse.** S1PR1-eGFP fluorescence confocal analysis in grey  
818 matter (A, cortex and B, hippocampus) and white matter areas (C, corpus callosum) of  
819 the mouse brain. Neuronal somas are stained with NeuroTrace® 530/615 Red  
820 Fluorescent Nissl (red channel). Note that S1PR1-eGFP is expressed in neurons and  
821 localized around the soma, mainly in the neuropil (A, B) and axons (C). Sections were  
822 imaged by using an FluoView FV10i confocal microscope (Olympus, Japan), (original  
823 magnification, x 60). Scale bar 20µm. Representative pictures are shown. N=5-6

824 **Supplementary Figure 2. Expression of S1PR1-eGFP and MAP-2**  
825 **immunofluorescence in neurons in the S1PR1-eGFP knock in mice.** S1PR1-eGFP  
826 fluorescence confocal analysis in grey matter (A, cortex and B, hippocampus) and white  
827 matter areas (C, D, internal capsule) of the mouse brain. Notice that S1PR1-eGFP  
828 signal is localized in the dendrites and neuronal processes (MAP-2 positive). D) Inset  
829 shown in panel C (digital zoom). Image shows localization of S1PR1-eGFP around the  
830 microtubules. Sections were imaged by using an FluoView FV10i confocal microscope  
831 (Olympus, Japan), (original magnification, x 60). Scale bar 20µm. Representative  
832 pictures are shown. N=5-6

833 **Supplementary Figure 3. Expression of S1PR1-eGFP and GFAP**  
834 **immunofluorescence in astrocytes in the S1PR1-eGFP knock in mice.** S1PR1-  
835 eGFP fluorescence confocal analysis in white matter areas (A, B, corpus callosum, C,  
836 internal capsule) of the mouse brain. Arrows indicate fibrous astrocytes positive for  
837 S1PR1-eGFP. B) Digital zoomed image of an astrocyte positive for S1PR1-eGFP. C)  
838 Digital zoomed image of an astrocyte negative for S1PR1-eGFP. Sections were imaged

839 by using an FluoView FV10i confocal microscope and a 60x objective (Olympus, Japan)

840 Scale bar 20 $\mu$ m. Representative pictures are shown. N=5-6

841

842 **Supplementary Figure 4. S1PR1 protein levels in cortical microvessels are**

843 **increased 24h after SAH.** Western blot analysis for S1PR1 in brain microvessels. 24

844 after subarachnoid hemorrhage (SAH) cortical microvessels were isolated and S1PR1

845 levels were detected by western blot ( $n = 4$ ). Immunoblot image (A) and quantification of

846 S1PR1 (B) are shown.  $\beta$ actin bands are used as a loading control and for normalization

847 in quantification. Individual values and mean  $\pm$ SEM are shown.  $**P < 0.01$ , t test.

848

849

| <b>Table 2. Sequences of the primers used for RT-qPCR</b> |                                                            |
|-----------------------------------------------------------|------------------------------------------------------------|
| <b>Target Genes</b>                                       | <b>Primer's Sequences</b>                                  |
| Mouse S1PR1                                               | F: CCGGATCGTATCTTGTTGCA<br>R: AAATTCCATGCCTGGGATGA         |
| Mouse S1PR2                                               | F: ATGGGCGGCTTATACTCAGAG<br>R: GCGCAGCACAAAGATGATGAT       |
| Mouse S1PR3                                               | F: GCCTAGCGGGAGAGAAACCT<br>R: CCGACTGCGGAAGAGTGT           |
| Mouse S1PR4                                               | F: TTAGAGTGGTCCGAGCCAATG<br>R: GATCATCAGCACGGTGTTGAGT      |
| Mouse S1PR5                                               | F: CACCGGCAGTCCTGGAGTA<br>R: AAGGGTTGGGAAGCGTCAGT          |
| 18S                                                       | F: ACCTCTCGAAGTGTTGGATACAG<br>R: TTCACTAATGACACAAACGTGATTC |

850  
851  
852

## 853 REFERENCES

- 854 [1] E.J. Benjamin, S.S. Virani, C.W. Callaway, A.M. Chamberlain, A.R. Chang, S. Cheng,  
855 S.E. Chiuve, M. Cushman, F.N. Delling, R. Deo, S.D. de Ferranti, J.F. Ferguson, M.  
856 Fornage, C. Gillespie, C.R. Isasi, M.C. Jimenez, L.C. Jordan, S.E. Judd, D. Lackland,  
857 J.H. Lichtman, L. Lisabeth, S. Liu, C.T. Longenecker, P.L. Lutsey, J.S. Mackey, D.B.  
858 Matchar, K. Matsushita, M.E. Mussolino, K. Nasir, M. O'Flaherty, L.P. Palaniappan, A.  
859 Pandey, D.K. Pandey, M.J. Reeves, M.D. Ritchey, C.J. Rodriguez, G.A. Roth, W.D.  
860 Rosamond, U.K.A. Sampson, G.M. Satou, S.H. Shah, N.L. Spartano, D.L. Tirschwell,  
861 C.W. Tsao, J.H. Voeks, J.Z. Willey, J.T. Wilkins, J.H. Wu, H.M. Alger, S.S. Wong, P.  
862 Muntner, E. American Heart Association Council on, C. Prevention Statistics, S. Stroke  
863 Statistics, Heart Disease and Stroke Statistics-2018 Update: A Report From the  
864 American Heart Association, *Circulation*, 137 (2018) e67-e492.
- 865 [2] R.D. Bell, E.A. Winkler, I. Singh, A.P. Sagare, R. Deane, Z. Wu, D.M. Holtzman, C.  
866 Betsholtz, A. Armulik, J. Sallstrom, B.C. Berk, B.V. Zlokovic, Apolipoprotein E controls  
867 cerebrovascular integrity via cyclophilin A, *Nature*, 485 (2012) 512-516.
- 868 [3] A. Armulik, G. Genove, M. Mae, M.H. Nisancioglu, E. Wallgard, C. Niaudet, L. He, J.  
869 Norlin, P. Lindblom, K. Strittmatter, B.R. Johansson, C. Betsholtz, Pericytes regulate the  
870 blood-brain barrier, *Nature*, 468 (2010) 557-561.
- 871 [4] N.J. Abbott, L. Ronnback, E. Hansson, Astrocyte-endothelial interactions at the  
872 blood-brain barrier, *Nat Rev Neurosci*, 7 (2006) 41-53.
- 873 [5] J.L. Saver, Improving reperfusion therapy for acute ischaemic stroke, *J Thromb*  
874 *Haemost*, 9 Suppl 1 (2011) 333-343.
- 875 [6] C.A. Molina, J. Alvarez-Sabin, Recanalization and reperfusion therapies for acute  
876 ischemic stroke, *Cerebrovasc Dis*, 27 Suppl 1 (2009) 162-167.
- 877 [7] G.F. Hamann, Y. Okada, G.J. del Zoppo, Hemorrhagic transformation and  
878 microvascular integrity during focal cerebral ischemia/reperfusion, *J Cereb Blood Flow*  
879 *Metab*, 16 (1996) 1373-1378.
- 880 [8] A. Ames, 3rd, R.L. Wright, M. Kowada, J.M. Thurston, G. Majno, Cerebral ischemia.  
881 II. The no-reflow phenomenon, *Am J Pathol*, 52 (1968) 437-453.
- 882 [9] G.J. del Zoppo, T. Mabuchi, Cerebral microvessel responses to focal ischemia, *J*  
883 *Cereb Blood Flow Metab*, 23 (2003) 879-894.
- 884 [10] S.B. Murthy, Y. Moradiya, J. Dawson, K.R. Lees, D.F. Hanley, W.C. Ziai, K. Butcher,  
885 S. Davis, B. Gregson, P. Lyden, S. Mayer, K. Muir, T. Steiner, Perihematomal Edema  
886 and Functional Outcomes in Intracerebral Hemorrhage, Influence of Hematoma Volume  
887 and Location, 46 (2015) 3088-3092.
- 888 [11] R.L. Macdonald, R.M. Pluta, J.H. Zhang, Cerebral vasospasm after subarachnoid  
889 hemorrhage: the emerging revolution, *Nature clinical practice. Neurology*, 3 (2007) 256-  
890 263.
- 891 [12] R.L. Macdonald, Delayed neurological deterioration after subarachnoid  
892 haemorrhage, *Nat Rev Neurol*, 10 (2014) 44-58.
- 893 [13] R.M. Pluta, J. Hansen-Schwartz, J. Dreier, P. Vajkoczy, R.L. Macdonald, S.  
894 Nishizawa, H. Kasuya, G. Wellman, E. Keller, A. Zauner, N. Dorsch, J. Clark, S. Ono, T.  
895 Kiris, P. Leroux, J.H. Zhang, Cerebral vasospasm following subarachnoid hemorrhage:  
896 time for a new world of thought, *Neurol Res*, 31 (2009) 151-158.
- 897 [14] G.J. del Zoppo, J.M. Hallenbeck, Advances in the Vascular Pathophysiology of  
898 Ischemic Stroke, *Thrombosis Research*, 98 (2000) 73-81.
- 899 [15] F.M. Faraci, Vascular protection, *Stroke*, 34 (2003) 327-329.
- 900 [16] W.C. Aird, Spatial and temporal dynamics of the endothelium, *J Thromb Haemost*, 3  
901 (2005) 1392-1406.

- 902 [17] T. Sanchez, Sphingosine-1-Phosphate Signaling in Endothelial Disorders, *Current*  
903 *atherosclerosis reports*, 18 (2016) 31.
- 904 [18] K. Venkataraman, Y.M. Lee, J. Michaud, S. Thangada, Y. Ai, H.L. Bonkovsky, N.S.  
905 Parikh, C. Habrukowich, T. Hla, Vascular endothelium as a contributor of plasma  
906 sphingosine 1-phosphate, *Circ Res*, 102 (2008) 669-676.
- 907 [19] S. Fukuhara, S. Simmons, S. Kawamura, A. Inoue, Y. Orba, T. Tokudome, Y.  
908 Sunden, Y. Arai, K. Moriwaki, J. Ishida, A. Uemura, H. Kiyonari, T. Abe, A. Fukamizu, M.  
909 Hirashima, H. Sawa, J. Aoki, M. Ishii, N. Mochizuki, The sphingosine-1-phosphate  
910 transporter Spns2 expressed on endothelial cells regulates lymphocyte trafficking in  
911 mice, *J Clin Invest*, 122 (2012) 1416-1426.
- 912 [20] R. Pappu, S.R. Schwab, I. Cornelissen, J.P. Pereira, J.B. Regard, Y. Xu, E.  
913 Camerer, Y.W. Zheng, Y. Huang, J.G. Cyster, S.R. Coughlin, Promotion of lymphocyte  
914 egress into blood and lymph by distinct sources of sphingosine-1-phosphate, *Science*,  
915 316 (2007) 295-298.
- 916 [21] N. Murata, K. Sato, J. Kon, H. Tomura, M. Yanagita, A. Kuwabara, M. Ui, F.  
917 Okajima, Interaction of sphingosine 1-phosphate with plasma components, including  
918 lipoproteins, regulates the lipid receptor-mediated actions, *Biochem J*, 352 Pt 3 (2000)  
919 809-815.
- 920 [22] C. Christoffersen, H. Obinata, S.B. Kumaraswamy, S. Galvani, J. Ahnstrom, M.  
921 Sevvana, C. Egerer-Sieber, Y.A. Muller, T. Hla, L.B. Nielsen, B. Dahlback, Endothelium-  
922 protective sphingosine-1-phosphate provided by HDL-associated apolipoprotein M, *Proc*  
923 *Natl Acad Sci U S A*, 108 (2011) 9613-9618.
- 924 [23] Y. Liu, R. Wada, T. Yamashita, Y. Mi, C.X. Deng, J.P. Hobson, H.M. Rosenfeldt,  
925 V.E. Nava, S.S. Chae, M.J. Lee, C.H. Liu, T. Hla, S. Spiegel, R.L. Proia, Edg-1, the G  
926 protein-coupled receptor for sphingosine-1-phosphate, is essential for vascular  
927 maturation, *J Clin Invest*, 106 (2000) 951-961.
- 928 [24] M.L. Allende, T. Yamashita, R.L. Proia, G-protein-coupled receptor S1P1 acts within  
929 endothelial cells to regulate vascular maturation, *Blood*, 102 (2003) 3665-3667.
- 930 [25] B. Jung, H. Obinata, S. Galvani, K. Mendelson, B.S. Ding, A. Skoura, B. Kinzel, V.  
931 Brinkmann, S. Rafii, T. Evans, T. Hla, Flow-regulated endothelial S1P receptor-1  
932 signaling sustains vascular development, *Developmental cell*, 23 (2012) 600-610.
- 933 [26] M.J. Lee, S. Thangada, K.P. Claffey, N. Ancellin, C.H. Liu, M. Kluk, M. Volpi, R.I.  
934 Sha'afi, T. Hla, Vascular endothelial cell adherens junction assembly and  
935 morphogenesis induced by sphingosine-1-phosphate, *Cell*, 99 (1999) 301-312.
- 936 [27] T. Sanchez, T. Estrada-Hernandez, J.H. Paik, M.T. Wu, K. Venkataraman, V.  
937 Brinkmann, K. Claffey, T. Hla, Phosphorylation and action of the immunomodulator  
938 FTY720 inhibits vascular endothelial cell growth factor-induced vascular permeability, *J*  
939 *Biol Chem*, 278 (2003) 47281-47290.
- 940 [28] S. Galvani, M. Sanson, V.A. Blaho, S.L. Swendeman, H. Conger, B. Dahlback, M.  
941 Kono, R.L. Proia, J.D. Smith, T. Hla, HDL-bound sphingosine 1-phosphate acts as a  
942 biased agonist for the endothelial cell receptor S1P1 to limit vascular inflammation,  
943 *Science signaling*, 8 (2015) ra79.
- 944 [29] T. Kimura, K. Sato, A. Kuwabara, H. Tomura, M. Ishiwara, I. Kobayashi, M. Ui, F.  
945 Okajima, Sphingosine 1-phosphate may be a major component of plasma lipoproteins  
946 responsible for the cytoprotective actions in human umbilical vein endothelial cells, *J Biol*  
947 *Chem*, 276 (2001) 31780-31785.
- 948 [30] B.A. Wilkerson, G.D. Grass, S.B. Wing, W.S. Argraves, K.M. Argraves, Sphingosine  
949 1-phosphate (S1P) carrier-dependent regulation of endothelial barrier: high density  
950 lipoprotein (HDL)-S1P prolongs endothelial barrier enhancement as compared with  
951 albumin-S1P via effects on levels, trafficking, and signaling of S1P1, *J Biol Chem*, 287  
952 (2012) 44645-44653.

- 953 [31] K. Sattler, M. Graler, P. Keul, S. Weske, C.M. Reimann, H. Jindrova, P.  
954 Kleinbongard, R. Sabbadini, M. Brocker-Preuss, R. Erbel, G. Heusch, B. Levkau,  
955 Defects of High-Density Lipoproteins in Coronary Artery Disease Caused by Low  
956 Sphingosine-1-Phosphate Content: Correction by Sphingosine-1-Phosphate-Loading,  
957 *Journal of the American College of Cardiology*, 66 (2015) 1470-1485.
- 958 [32] K. Sattler, I. Lehmann, M. Graler, M. Brocker-Preuss, R. Erbel, G. Heusch, B.  
959 Levkau, HDL-bound sphingosine 1-phosphate (S1P) predicts the severity of coronary  
960 artery atherosclerosis, *Cellular physiology and biochemistry : international journal of*  
961 *experimental cellular physiology, biochemistry, and pharmacology*, 34 (2014) 172-184.
- 962 [33] C. Frej, A. Linder, K.E. Happonen, F.B. Taylor, F. Lupu, B. Dahlback, Sphingosine  
963 1-phosphate and its carrier apolipoprotein M in human sepsis and in *Escherichia coli*  
964 sepsis in baboons, *Journal of cellular and molecular medicine*, 20 (2016) 1170-1181.
- 965 [34] P. Plomgaard, R.P. Dullaart, R. de Vries, A.K. Groen, B. Dahlback, L.B. Nielsen,  
966 Apolipoprotein M predicts pre-beta-HDL formation: studies in type 2 diabetic and  
967 nondiabetic subjects, *Journal of internal medicine*, 266 (2009) 258-267.
- 968 [35] M. Ruiz, C. Frej, A. Holmer, L.J. Guo, S. Tran, B. Dahlback, High-Density  
969 Lipoprotein-Associated Apolipoprotein M Limits Endothelial Inflammation by Delivering  
970 Sphingosine-1-Phosphate to the Sphingosine-1-Phosphate Receptor 1, *Arterioscler*  
971 *Thromb Vasc Biol*, 37 (2017) 118-129.
- 972 [36] C. Frej, A.J. Mendez, M. Ruiz, M. Castillo, T.A. Hughes, B. Dahlback, R.B.  
973 Goldberg, A Shift in ApoM/S1P Between HDL-Particles in Women With Type 1 Diabetes  
974 Mellitus Is Associated With Impaired Anti-Inflammatory Effects of the ApoM/S1P  
975 Complex, *Arterioscler Thromb Vasc Biol*, 37 (2017) 1194-1205.
- 976 [37] M. Matloubian, C.G. Lo, G. Cinamon, M.J. Lesneski, Y. Xu, V. Brinkmann, M.L.  
977 Allende, R.L. Proia, J.G. Cyster, Lymphocyte egress from thymus and peripheral  
978 lymphoid organs is dependent on S1P receptor 1, *Nature*, 427 (2004) 355-360.
- 979 [38] V. Brinkmann, M.D. Davis, C.E. Heise, R. Albert, S. Cottens, R. Hof, C. Bruns, E.  
980 Prieschl, T. Baumruker, P. Hiestand, C.A. Foster, M. Zollinger, K.R. Lynch, The immune  
981 modulator FTY720 targets sphingosine 1-phosphate receptors, *J Biol Chem*, 277 (2002)  
982 21453-21457.
- 983 [39] V. Brinkmann, A. Billich, T. Baumruker, P. Heining, R. Schmouder, G. Francis, S.  
984 Aradhye, P. Burtin, Fingolimod (FTY720): discovery and development of an oral drug to  
985 treat multiple sclerosis, *Nat Rev Drug Discov*, 9 (2010) 883-897.
- 986 [40] S. Pan, N.S. Gray, W. Gao, Y. Mi, Y. Fan, X. Wang, T. Tuntland, J. Che, S.  
987 Lefebvre, Y. Chen, A. Chu, K. Hinterding, A. Gardin, P. End, P. Heining, C. Bruns, N.G.  
988 Cooke, B. Nueslein-Hildesheim, Discovery of BAF312 (Siponimod), a Potent and  
989 Selective S1P Receptor Modulator, *ACS medicinal chemistry letters*, 4 (2013) 333-337.
- 990 [41] K. LaMontagne, A. Littlewood-Evans, C. Schnell, T. O'Reilly, L. Wyder, T. Sanchez,  
991 B. Probst, J. Butler, A. Wood, G. Liau, E. Billy, A. Theuer, T. Hla, J. Wood, Antagonism  
992 of sphingosine-1-phosphate receptors by FTY720 inhibits angiogenesis and tumor  
993 vascularization, *Cancer Res*, 66 (2006) 221-231.
- 994 [42] M.L. Oo, S.H. Chang, S. Thangada, M.T. Wu, K. Rezaul, V. Blaho, S.I. Hwang, D.K.  
995 Han, T. Hla, Engagement of S1P(1)-degradative mechanisms leads to vascular leak in  
996 mice, *J Clin Invest*, 121 (2011) 2290-2300.
- 997 [43] P. Gergely, B. Nueslein-Hildesheim, D. Guerini, V. Brinkmann, M. Traebert, C.  
998 Bruns, S. Pan, N.S. Gray, K. Hinterding, N.G. Cooke, A. Groenewegen, A. Vitaliti, T.  
999 Sing, O. Luttringer, J. Yang, A. Gardin, N. Wang, W.J. Crumb, Jr., M. Saltzman, M.  
1000 Rosenberg, E. Wallstrom, The selective sphingosine 1-phosphate receptor modulator  
1001 BAF312 redirects lymphocyte distribution and has species-specific effects on heart rate,  
1002 *Br J Pharmacol*, 167 (2012) 1035-1047.



- 1003 [44] J. Quancard, B. Bollbuck, P. Janser, D. Angst, F. Berst, P. Buehlmayer, M. Streiff,  
1004 C. Beerli, V. Brinkmann, D. Guerini, Paul A. Smith, Timothy J. Seabrook, M. Traebert, K.  
1005 Seuwen, R. Hersperger, C. Bruns, F. Bassilana, M. Bigaud, A Potent and Selective  
1006 S1P1 Antagonist with Efficacy in Experimental Autoimmune Encephalomyelitis,  
1007 *Chemistry & Biology*, 19 (2012) 1142-1151.
- 1008 [45] Y. Hasegawa, H. Suzuki, T. Sozen, W. Rolland, J.H. Zhang, Activation of  
1009 sphingosine 1-phosphate receptor-1 by FTY720 is neuroprotective after ischemic stroke  
1010 in rats, *Stroke*, 41 (2010) 368-374.
- 1011 [46] Y. Wei, M. Yemisci, H.H. Kim, L.M. Yung, H.K. Shin, S.K. Hwang, S. Guo, T. Qin, N.  
1012 Alsharif, V. Brinkmann, J.K. Liao, E.H. Lo, C. Waeber, Fingolimod provides long-term  
1013 protection in rodent models of cerebral ischemia, *Ann Neurol*, (2011).
- 1014 [47] V.H. Brait, G. Tarrason, A. Gavalda, N. Godessart, A.M. Planas, Selective  
1015 Sphingosine 1-Phosphate Receptor 1 Agonist Is Protective Against  
1016 Ischemia/Reperfusion in Mice, *Stroke*, 47 (2016) 3053-3056.
- 1017 [48] P. Kraft, E. Gob, M.K. Schuhmann, K. Gobel, C. Deppermann, I. Thielmann, A.M.  
1018 Herrmann, K. Lorenz, M. Brede, G. Stoll, S.G. Meuth, B. Nieswandt, W. Pfeilschifter, C.  
1019 Kleinschnitz, FTY720 ameliorates acute ischemic stroke in mice by reducing thrombo-  
1020 inflammation but not by direct neuroprotection, *Stroke*, 44 (2013) 3202-3210.
- 1021 [49] A. Vogelgesang, U. Grunwald, S. Langner, R. Jack, B.M. Broker, C. Kessler, A.  
1022 Dressel, Analysis of lymphocyte subsets in patients with stroke and their influence on  
1023 infection after stroke, *Stroke*, 39 (2008) 237-241.
- 1024 [50] U. Dirnagl, J. Klehmet, J.S. Braun, H. Harms, C. Meisel, T. Ziemssen, K. Prass, A.  
1025 Meisel, Stroke-induced immunodepression: experimental evidence and clinical  
1026 relevance, *Stroke*, 38 (2007) 770-773.
- 1027 [51] W.F. Westendorp, P.J. Nederkoorn, J.D. Vermeij, M.G. Dijkgraaf, D. van de Beek,  
1028 Post-stroke infection: a systematic review and meta-analysis, *BMC neurology*, 11 (2011)  
1029 110.
- 1030 [52] L. Ulm, H. Harms, S. Ohlraun, P. Reimnitz, A. Meisel, Impact of infections on long-  
1031 term outcome after severe middle cerebral artery infarction, *Journal of the Neurological*  
1032 *Sciences*, 319 (2012) 15-17.
- 1033 [53] Y. Fu, J. Hao, N. Zhang, L. Ren, N. Sun, Y.J. Li, Y. Yan, D. Huang, C. Yu, F.D. Shi,  
1034 Fingolimod for the treatment of intracerebral hemorrhage: a 2-arm proof-of-concept  
1035 study, *JAMA neurology*, 71 (2014) 1092-1101.
- 1036 [54] Y. Fu, N. Zhang, L. Ren, Y. Yan, N. Sun, Y.J. Li, W. Han, R. Xue, Q. Liu, J. Hao, C.  
1037 Yu, F.D. Shi, Impact of an immune modulator fingolimod on acute ischemic stroke, *Proc*  
1038 *Natl Acad Sci U S A*, 111 (2014) 18315-18320.
- 1039 [55] Z. Zhu, Y. Fu, D. Tian, N. Sun, W. Han, G. Chang, Y. Dong, X. Xu, Q. Liu, D.  
1040 Huang, F.D. Shi, Combination of an Immune Modulator Fingolimod with Alteplase in  
1041 Acute Ischemic Stroke: A Pilot Trial, *Circulation*, (2015).
- 1042 [56] K. Yanagida, C.H. Liu, G. Faraco, S. Galvani, H.K. Smith, N. Burg, J. Anrather, T.  
1043 Sanchez, C. Iadecola, T. Hla, Size-selective opening of the blood-brain barrier by  
1044 targeting endothelial sphingosine 1-phosphate receptor 1, *Proc Natl Acad Sci U S A*, 114  
1045 (2017) 4531–4536.
- 1046 [57] M.E. Pitulescu, I. Schmidt, R. Benedito, R.H. Adams, Inducible gene targeting in the  
1047 neonatal vasculature and analysis of retinal angiogenesis in mice, *Nature protocols*, 5  
1048 (2010) 1518-1534.
- 1049 [58] S.M. Cahalan, P.J. Gonzalez-Cabrera, G. Sarkisyan, N. Nguyen, M.T. Schaeffer, L.  
1050 Huang, A. Yeager, B. Clemons, F. Scott, H. Rosen, Actions of a picomolar short-acting  
1051 S1P(1) agonist in S1P(1)-eGFP knock-in mice, *Nat Chem Biol*, 7 (2011) 254-256.

- 1052 [59] Y. Lee, H. Uchida, H. Smith, A. Ito, T. Sanchez, The isolation and molecular  
1053 characterization of cerebral microvessels, *Nature protocols*, (2019) doi: 10.1038/s41596-  
1054 019-0212-0.
- 1055 [60] G.S. Kim, L. Yang, G. Zhang, H. Zhao, M. Selim, L.D. McCullough, M.J. Kluk, T.  
1056 Sanchez, Critical role of sphingosine-1-phosphate receptor-2 in the disruption of  
1057 cerebrovascular integrity in experimental stroke, *Nature communications*, 6 (2015) 7893.
- 1058 [61] H. Kamii, T. Tominaga, *Filament Perforation Subarachnoid Hemorrhage: Mouse*  
1059 *Model, Animal Models of Acute Neurological Injuries* (Chen J, Xu X-M, Xu ZC, Zhang  
1060 JH, editors). Humana Press, Totowa, NJ, Chapter 23 (2009) 279-286.
- 1061 [62] M.J. Kluk, K.P. Ryan, B. Wang, G. Zhang, S.J. Rodig, T. Sanchez, Sphingosine-1-  
1062 phosphate receptor 1 in classical Hodgkin lymphoma: assessment of expression and  
1063 role in cell migration, *Lab Invest*, 93 (2013) 462-471.
- 1064 [63] T. Sugawara, R. Ayer, V. Jadhav, J.H. Zhang, A new grading system evaluating  
1065 bleeding scale in filament perforation subarachnoid hemorrhage rat model, *Journal of*  
1066 *neuroscience methods*, 167 (2008) 327-334.
- 1067 [64] Y. Liu, N.L. Jennings, A.M. Dart, X.J. Du, Standardizing a simpler, more sensitive  
1068 and accurate tail bleeding assay in mice, *World journal of experimental medicine*, 2  
1069 (2012) 30-36.
- 1070 [65] A. Parra, M.J. McGirt, H. Sheng, D.T. Laskowitz, R.D. Pearlstein, D.S. Warner,  
1071 Mouse model of subarachnoid hemorrhage associated cerebral vasospasm:  
1072 methodological analysis, *Neurol Res*, 24 (2002) 510-516.
- 1073 [66] A.K. Vellimana, E. Milner, T.D. Azad, M.D. Harries, M.L. Zhou, J.M. Gidday, B.H.  
1074 Han, G.J. Zipfel, Endothelial nitric oxide synthase mediates endogenous protection  
1075 against subarachnoid hemorrhage-induced cerebral vasospasm, *Stroke*, 42 (2011) 776-  
1076 782.
- 1077 [67] M. Adachi, I. Feigin, Cerebral oedema and the water content of normal white matter,  
1078 *Journal of neurology, neurosurgery, and psychiatry*, 29 (1966) 446-450.
- 1079 [68] C. Lu, F. Zhu, Y.Y. Cho, F. Tang, T. Zykova, W.Y. Ma, A.M. Bode, Z. Dong, Cell  
1080 apoptosis: requirement of H2AX in DNA ladder formation, but not for the activation of  
1081 caspase-3, *Mol Cell*, 23 (2006) 121-132.
- 1082 [69] E.P. Rogakou, C. Boon, C. Redon, W.M. Bonner, Megabase Chromatin Domains  
1083 Involved in DNA Double-Strand Breaks in Vivo, *The Journal of Cell Biology*, 146 (1999)  
1084 905-916.
- 1085 [70] A. Sharma, K. Singh, A. Almasan, Histone H2AX phosphorylation: a marker for DNA  
1086 damage, *Methods Mol Biol*, 920 (2012) 613-626.
- 1087 [71] O. Uyama, N. Okamura, M. Yanase, M. Narita, K. Kawabata, M. Sugita, Quantitative  
1088 evaluation of vascular permeability in the gerbil brain after transient ischemia using  
1089 Evans blue fluorescence, *J Cereb Blood Flow Metab*, 8 (1988) 282-284.
- 1090 [72] A. Hoffmann, J. Bredno, M. Wendland, N. Derugin, P. Ohara, M. Wintermark, High  
1091 and Low Molecular Weight Fluorescein Isothiocyanate (FITC)-Dextrans to Assess Blood-  
1092 Brain Barrier Disruption: Technical Considerations, *Translational stroke research*, 2  
1093 (2011) 106-111.
- 1094 [73] G. Zhang, L. Yang, G.S. Kim, K. Ryan, S. Lu, R.K. O'Donnell, K. Spokes, N.  
1095 Shapiro, W.C. Aird, M.J. Kluk, K. Yano, T. Sanchez, Critical role of sphingosine-1-  
1096 phosphate receptor 2 (S1PR2) in acute vascular inflammation, *Blood*, 122 (2013) 443-  
1097 455.
- 1098 [74] S.C. Shih, L.E. Smith, Quantitative multi-gene transcriptional profiling using real-  
1099 time PCR with a master template, *Exp Mol Pathol*, 79 (2005) 14-22.
- 1100 [75] R. Montesano, M.S. Pepper, U. Mohle-Steinlein, W. Risau, E.F. Wagner, L. Orci,  
1101 Increased proteolytic activity is responsible for the aberrant morphogenetic behavior of  
1102 endothelial cells expressing the middle T oncogene, *Cell*, 62 (1990) 435-445.

- 1103 [76] C. Muroi, M. Fujioka, S. Marbacher, J. Fandino, E. Keller, K. Iwasaki, K. Mishima,  
1104 Mouse model of subarachnoid hemorrhage: technical note on the filament perforation  
1105 model, *Acta Neurochir Suppl*, 120 (2015) 315-320.
- 1106 [77] E. Vandenbroucke, D. Mehta, R. Minshall, A.B. Malik, Regulation of endothelial  
1107 junctional permeability, *Ann N Y Acad Sci*, 1123 (2008) 134-145.
- 1108 [78] Y. Shi, L. Zhang, H. Pu, L. Mao, X. Hu, X. Jiang, N. Xu, R.A. Stetler, F. Zhang, X.  
1109 Liu, R.K. Leak, R.F. Keep, X. Ji, J. Chen, Rapid endothelial cytoskeletal reorganization  
1110 enables early blood-brain barrier disruption and long-term ischaemic reperfusion brain  
1111 injury, *Nature communications*, 7 (2016) 10523.
- 1112 [79] H. Sadeghian, B. Lacoste, T. Qin, X. Toussay, R. Rosa, F. Oka, D.Y. Chung, T.  
1113 Takizawa, C. Gu, C. Ayata, Spreading depolarizations trigger caveolin-1-dependent  
1114 endothelial transcytosis, *Annals of Neurology*, 84 (2018) 409-423.
- 1115 [80] C.R. Kuhlmann, R. Tamaki, M. Gamerdinger, V. Lessmann, C. Behl, O.S. Kempfski,  
1116 H.J. Luhmann, Inhibition of the myosin light chain kinase prevents hypoxia-induced  
1117 blood-brain barrier disruption, *J Neurochem*, 102 (2007) 501-507.
- 1118 [81] D. Shlosberg, M. Benifla, D. Kaufer, A. Friedman, Blood-brain barrier breakdown as  
1119 a therapeutic target in traumatic brain injury, *Nat Rev Neurol*, 6 (2010) 393-403.
- 1120 [82] A. Chodobski, B.J. Zink, J. Szmydynger-Chodobska, Blood-brain barrier  
1121 pathophysiology in traumatic brain injury, *Translational stroke research*, 2 (2011) 492-  
1122 516.
- 1123 [83] K. Kenney, F. Amyot, M. Haber, A. Pronger, T. Bogoslovsky, C. Moore, R. Diaz-  
1124 Arrastia, Cerebral Vascular Injury in Traumatic Brain Injury, *Experimental Neurology*,  
1125 275 (2016) 353-366.
- 1126 [84] A. Pitkanen, W. Loscher, A. Vezzani, A.J. Becker, M. Simonato, K. Lukasiuk, O.  
1127 Grohn, J.P. Bankstahl, A. Friedman, E. Aronica, J.A. Gorter, T. Ravizza, S.M. Sisodiya,  
1128 M. Kokaia, H. Beck, Advances in the development of biomarkers for epilepsy, *Lancet*  
1129 *Neurol*, 15 (2016) 843-856.
- 1130 [85] E. Iacobone, J. Bailly-Salin, A. Polito, D. Friedman, R.D. Stevens, T. Sharshar,  
1131 Sepsis-associated encephalopathy and its differential diagnosis, *Critical care medicine*,  
1132 37 (2009) S331-336.
- 1133 [86] D.A. Nation, M.D. Sweeney, A. Montagne, A.P. Sagare, L.M. D'Orazio, M.  
1134 Pachicano, F. Seppehrband, A.R. Nelson, D.P. Buennagel, M.G. Harrington, T.L.S.  
1135 Benzinger, A.M. Fagan, J.M. Ringman, L.S. Schneider, J.C. Morris, H.C. Chui, M. Law,  
1136 A.W. Toga, B.V. Zlokovic, Blood-brain barrier breakdown is an early biomarker of human  
1137 cognitive dysfunction, *Nat Med*, (2019).
- 1138 [87] A. Montagne, S.R. Barnes, M.D. Sweeney, M.R. Halliday, A.P. Sagare, Z. Zhao,  
1139 A.W. Toga, R.E. Jacobs, C.Y. Liu, L. Amezcua, M.G. Harrington, H.C. Chui, M. Law,  
1140 B.V. Zlokovic, Blood-brain barrier breakdown in the aging human hippocampus, *Neuron*,  
1141 85 (2015) 296-302.
- 1142 [88] B.V. Zlokovic, The blood-brain barrier in health and chronic neurodegenerative  
1143 disorders, *Neuron*, 57 (2008) 178-201.
- 1144 [89] C.P. Doherty, E. O'Keefe, E. Wallace, T. Loftus, J. Keaney, J. Kealy, M.M.  
1145 Humphries, M.G. Molloy, J.F. Meaney, M. Farrell, M. Campbell, Blood-Brain Barrier  
1146 Dysfunction as a Hallmark Pathology in Chronic Traumatic Encephalopathy, *J*  
1147 *Neuropathol Exp Neurol*, 75 (2016) 656-662.
- 1148 [90] S.C. Johnston, S. Selvin, D.R. Gress, The burden, trends, and demographics of  
1149 mortality from subarachnoid hemorrhage, *Neurology*, 50 (1998) 1413-1418.
- 1150 [91] J. van Gijn, R.S. Kerr, G.J. Rinkel, Subarachnoid haemorrhage, *Lancet*, 369 (2007)  
1151 306-318.
- 1152 [92] T. Al-Khindi, R.L. Macdonald, T.A. Schweizer, Cognitive and functional outcome  
1153 after aneurysmal subarachnoid hemorrhage, *Stroke*, 41 (2010) e519-536.

- 1154 [93] T. Dóczi, The pathogenetic and prognostic significance of blood-brain barrier  
1155 damage at the acute stage of aneurysmal subarachnoid haemorrhage. *Clinical and*  
1156 *experimental studies, Acta Neurochirurgica*, 77 (1985) 110-132.
- 1157 [94] S. Park, M. Yamaguchi, C. Zhou, J.W. Calvert, J. Tang, J.H. Zhang, Neurovascular  
1158 protection reduces early brain injury after subarachnoid hemorrhage, *Stroke*, 35 (2004)  
1159 2412-2417.
- 1160 [95] P. Lackner, A. Dietmann, R. Beer, M. Fischer, G. Broessner, R. Helbok, J. Marxgut,  
1161 B. Pfausler, E. Schmutzhard, Cellular Microparticles as a Marker for Cerebral  
1162 Vasospasm in Spontaneous Subarachnoid Hemorrhage, *Stroke*, 41 (2010) 2353-2357.
- 1163 [96] M. Fischer, G. Broessner, A. Dietmann, R. Beer, R. Helbok, B. Pfausler, A.  
1164 Chemelli, E. Schmutzhard, P. Lackner, Angiopietin-1 is associated with cerebral  
1165 vasospasm and delayed cerebral ischemia in subarachnoid hemorrhage, *BMC*  
1166 *neurology*, 11 (2011) 59.
- 1167 [97] H. Suzuki, Y. Hasegawa, K. Kanamaru, J.H. Zhang, Mechanisms of osteopontin-  
1168 induced stabilization of blood-brain barrier disruption after subarachnoid hemorrhage in  
1169 rats, *Stroke*, 41 (2010) 1783-1790.
- 1170 [98] O. Altay, H. Suzuki, Y. Hasegawa, B. Caner, P.R. Krafft, M. Fujii, J. Tang, J.H.  
1171 Zhang, Isoflurane attenuates blood-brain barrier disruption in ipsilateral hemisphere after  
1172 subarachnoid hemorrhage in mice, *Stroke*, 43 (2012) 2513-2516.
- 1173 [99] Z. Wang, C.J. Meng, X.M. Shen, Z. Shu, C. Ma, G.Q. Zhu, H.X. Liu, W.C. He, X.B.  
1174 Sun, L. Huo, J. Zhang, G. Chen, Potential contribution of hypoxia-inducible factor-  
1175 1alpha, aquaporin-4, and matrix metalloproteinase-9 to blood-brain barrier disruption  
1176 and brain edema after experimental subarachnoid hemorrhage, *Journal of molecular*  
1177 *neuroscience : MN*, 48 (2012) 273-280.
- 1178 [100] Y. Egashira, H. Zhao, Y. Hua, R.F. Keep, G. Xi, White Matter Injury After  
1179 Subarachnoid Hemorrhage: Role of Blood-Brain Barrier Disruption and Matrix  
1180 Metalloproteinase-9, *Stroke*, 46 (2015) 2909-2915.
- 1181 [101] F.A. Sehba, G. Mostafa, J. Knopman, V. Friedrich, Jr., J.B. Bederson, Acute  
1182 alterations in microvascular basal lamina after subarachnoid hemorrhage, *J Neurosurg*,  
1183 101 (2004) 633-640.
- 1184 [102] D.A. Siler, Y.A. Berlow, A. Kukino, C.M. Davis, J.W. Nelson, M.R. Grafe, H. Ono,  
1185 J.S. Cetas, M. Pike, N.J. Alkayed, Soluble Epoxide Hydrolase in Hydrocephalus,  
1186 Cerebral Edema, and Vascular Inflammation After Subarachnoid Hemorrhage, *Stroke*,  
1187 46 (2015) 1916-1922.
- 1188 [103] I. Weissberg, L. Wood, L. Kamintsky, O. Vazquez, D.Z. Milikovsky, A. Alexander,  
1189 H. Oppenheim, C. Ardizzone, A. Becker, F. Frigerio, A. Vezzani, M.S. Buckwalter, J.R.  
1190 Huguenard, A. Friedman, D. Kaufer, Albumin induces excitatory synaptogenesis through  
1191 astrocytic TGF-beta/ALK5 signaling in a model of acquired epilepsy following blood-brain  
1192 barrier dysfunction, *Neurobiol Dis*, 78 (2015) 115-125.
- 1193 [104] M.A. Petersen, J.K. Ryu, K. Akassoglou, Fibrinogen in neurological diseases:  
1194 mechanisms, imaging and therapeutics, *Nat Rev Neurosci*, 19 (2018) 283-301.
- 1195 [105] R.F. Keep, A.V. Andjelkovic, J. Xiang, S.M. Stamatovic, D.A. Antonetti, Y. Hua, G.  
1196 Xi, Brain endothelial cell junctions after cerebral hemorrhage: Changes, mechanisms  
1197 and therapeutic targets, *J Cereb Blood Flow Metab*, (2018) 271678X18774666.
- 1198 [106] B. Obermeier, R. Daneman, R.M. Ransohoff, Development, maintenance and  
1199 disruption of the blood-brain barrier, *Nat Med*, 19 (2013) 1584-1596.
- 1200 [107] S. Liebner, R.M. Dijkhuizen, Y. Reiss, K.H. Plate, D. Agalliu, G. Constantin,  
1201 Functional morphology of the blood-brain barrier in health and disease, *Acta*  
1202 *Neuropathologica*, 135 (2018) 311-336.
- 1203 [108] S. Nag, Morphology and molecular properties of cellular components of normal  
1204 cerebral vessels, *Methods in molecular medicine*, 89 (2003) 3-36.

- 1205 [109] R. Daneman, L. Zhou, A.A. Kebede, B.A. Barres, Pericytes are required for blood-  
1206 brain barrier integrity during embryogenesis, *Nature*, 468 (2010) 562-566.
- 1207 [110] Y. Gasche, M. Fujimura, Y. Morita-Fujimura, J.C. Copin, M. Kawase, J.  
1208 Massengale, P.H. Chan, Early appearance of activated matrix metalloproteinase-9 after  
1209 focal cerebral ischemia in mice: a possible role in blood-brain barrier dysfunction, *J*  
1210 *Cereb Blood Flow Metab*, 19 (1999) 1020-1028.
- 1211 [111] G.A. Rosenberg, E.Y. Estrada, J.E. Dencoff, Matrix metalloproteinases and TIMPs  
1212 are associated with blood-brain barrier opening after reperfusion in rat brain, *Stroke*, 29  
1213 (1998) 2189-2195.
- 1214 [112] M. Asahi, T. Sumii, M.E. Fini, S. Itohara, E.H. Lo, Matrix metalloproteinase 2 gene  
1215 knockout has no effect on acute brain injury after focal ischemia, *Neuroreport*, 12 (2001)  
1216 3003-3007.
- 1217 [113] M. Asahi, X. Wang, T. Mori, T. Sumii, J.C. Jung, M.A. Moskowitz, M.E. Fini, E.H.  
1218 Lo, Effects of matrix metalloproteinase-9 gene knock-out on the proteolysis of blood-  
1219 brain barrier and white matter components after cerebral ischemia, *J Neurosci*, 21  
1220 (2001) 7724-7732.
- 1221 [114] G.F. Hamann, Y. Okada, R. Fitridge, G.J. del Zoppo, Microvascular basal lamina  
1222 antigens disappear during cerebral ischemia and reperfusion, *Stroke*, 26 (1995) 2120-  
1223 2126.
- 1224 [115] D. Knowland, A. Arac, K.J. Sekiguchi, M. Hsu, S.E. Lutz, J. Perrino, G.K.  
1225 Steinberg, B.A. Barres, A. Nimmerjahn, D. Agalliu, Stepwise recruitment of transcellular  
1226 and paracellular pathways underlies blood-brain barrier breakdown in stroke, *Neuron*, 82  
1227 (2014) 603-617.
- 1228 [116] D. Günzel, A.S.L. Yu, Claudins and the modulation of tight junction permeability,  
1229 *Physiological reviews*, 93 (2013) 525-569.
- 1230 [117] Z. Li, Y.H. Liu, Y.X. Xue, L.B. Liu, P. Wang, Low-dose endothelial monocyte-  
1231 activating polypeptide-ii increases permeability of blood-tumor barrier by caveolae-  
1232 mediated transcellular pathway, *Journal of molecular neuroscience : MN*, 52 (2014) 313-  
1233 322.
- 1234 [118] K.N. Anwar, F. Fazal, A.B. Malik, A. Rahman, RhoA/Rho-associated kinase  
1235 pathway selectively regulates thrombin-induced intercellular adhesion molecule-1  
1236 expression in endothelial cells via activation of I kappa B kinase beta and  
1237 phosphorylation of RelA/p65, *J Immunol*, 173 (2004) 6965-6972.
- 1238 [119] M. Gorovoy, R. Neamu, J. Niu, S. Vogel, D. Predescu, J. Miyoshi, Y. Takai, V. Kini,  
1239 D. Mehta, A.B. Malik, T. Voyno-Yasenetskaya, RhoGDI-1 modulation of the activity of  
1240 monomeric RhoGTPase RhoA regulates endothelial barrier function in mouse lungs,  
1241 *Circ Res*, 101 (2007) 50-58.
- 1242 [120] L. Kappos, D.K. Li, O. Stuve, H.P. Hartung, M.S. Freedman, B. Hemmer, P.  
1243 Rieckmann, X. Montalban, T. Ziemssen, B. Hunter, S. Arnould, E. Wallstrom, K. Selmaj,  
1244 Safety and Efficacy of Siponimod (BAF312) in Patients With Relapsing-Remitting  
1245 Multiple Sclerosis: Dose-Blinded, Randomized Extension of the Phase 2 BOLD Study,  
1246 *JAMA neurology*, 73 (2016) 1089-1098.
- 1247 [121] L. Kappos, E.W. Radue, P. O'Connor, C. Polman, R. Hohlfeld, P. Calabresi, K.  
1248 Selmaj, C. Agoropoulou, M. Leyk, L. Zhang-Auberson, P. Burtin, F.S. Group, A placebo-  
1249 controlled trial of oral fingolimod in relapsing multiple sclerosis, *N Engl J Med*, 362  
1250 (2010) 387-401.
- 1251 [122] J.A. Cohen, F. Barkhof, G. Comi, H.P. Hartung, B.O. Khatir, X. Montalban, J.  
1252 Pelletier, R. Capra, P. Gallo, G. Izquierdo, K. Tiel-Wilck, A. de Vera, J. Jin, T. Stites, S.  
1253 Wu, S. Aradhye, L. Kappos, T.S. Group, Oral fingolimod or intramuscular interferon for  
1254 relapsing multiple sclerosis, *N Engl J Med*, 362 (2010) 402-415.

- 1255 [123] H. Linda, A. von Heijne, A case of posterior reversible encephalopathy syndrome  
1256 associated with gilenya((R)) (fingolimod) treatment for multiple sclerosis, *Frontiers in*  
1257 *neurology*, 6 (2015) 39.
- 1258 [124] S.L. Swendeman, Y. Xiong, A. Cantalupo, H. Yuan, N. Burg, Y. Hisano, A. Cartier,  
1259 C.H. Liu, E. Engelbrecht, V. Blaho, Y. Zhang, K. Yanagida, S. Galvani, H. Obinata, J.E.  
1260 Salmon, T. Sanchez, A. Di Lorenzo, T. Hla, An engineered S1P chaperone attenuates  
1261 hypertension and ischemic injury, *Science signaling*, 10 (2017).
- 1262  
1263

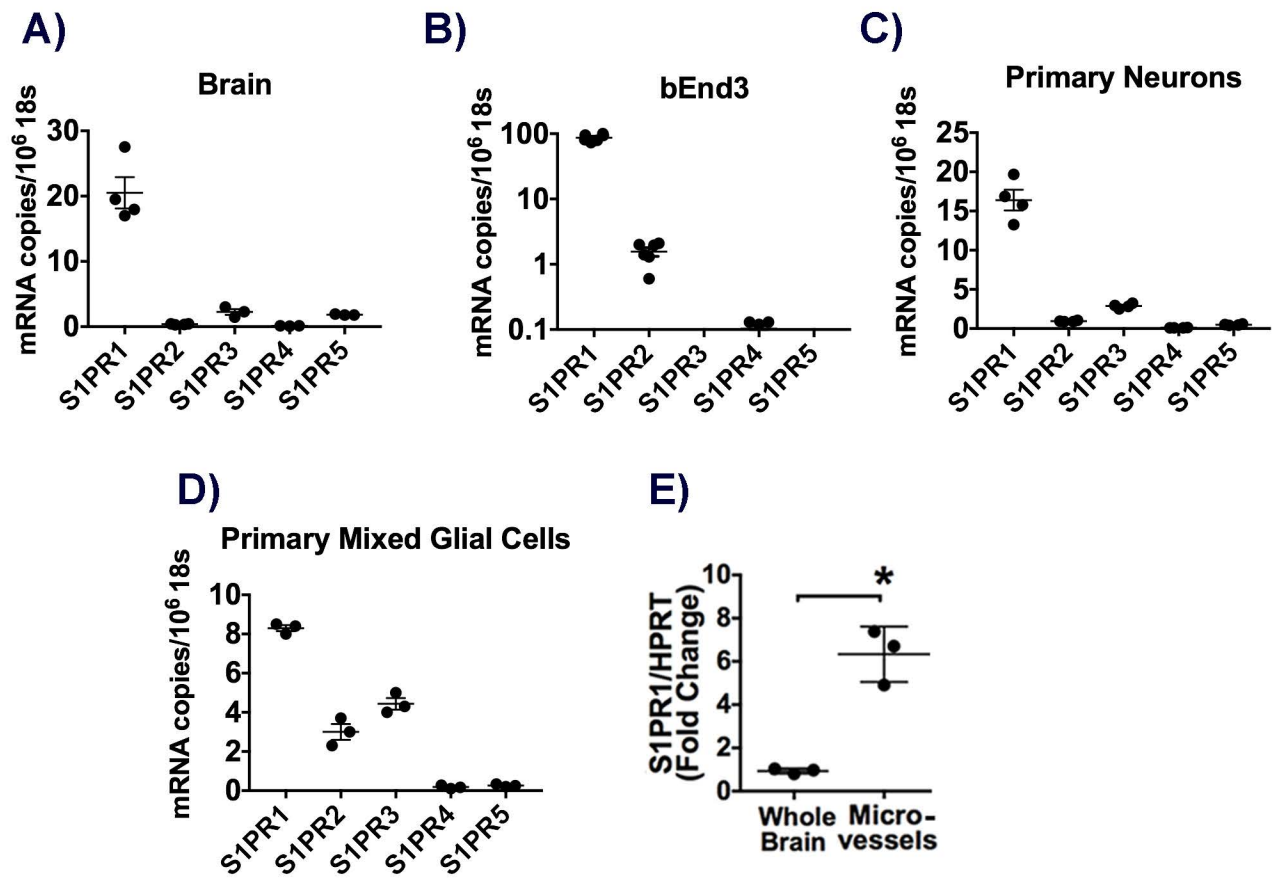

Figure 1

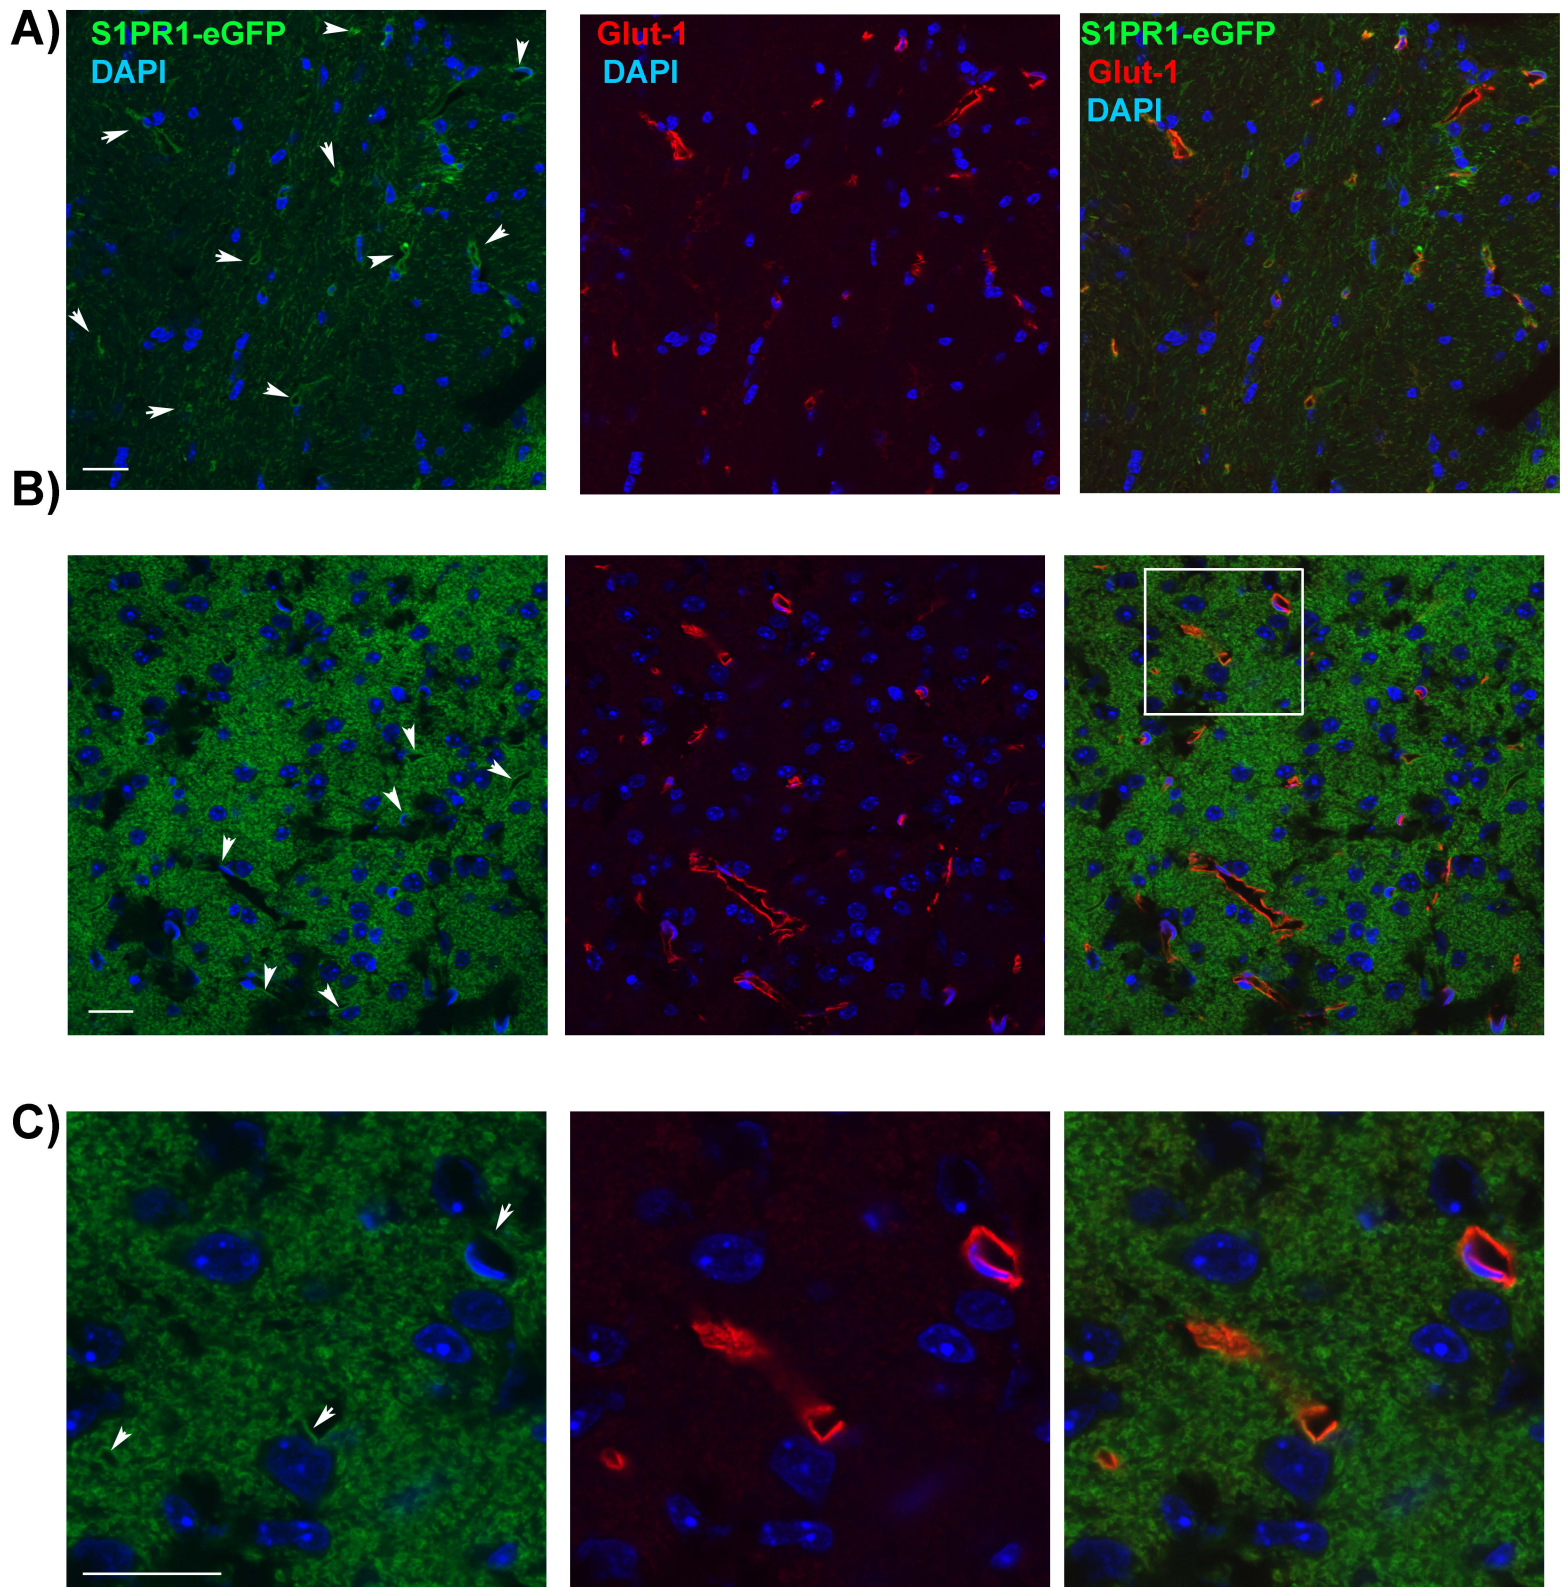

**Figure 2**



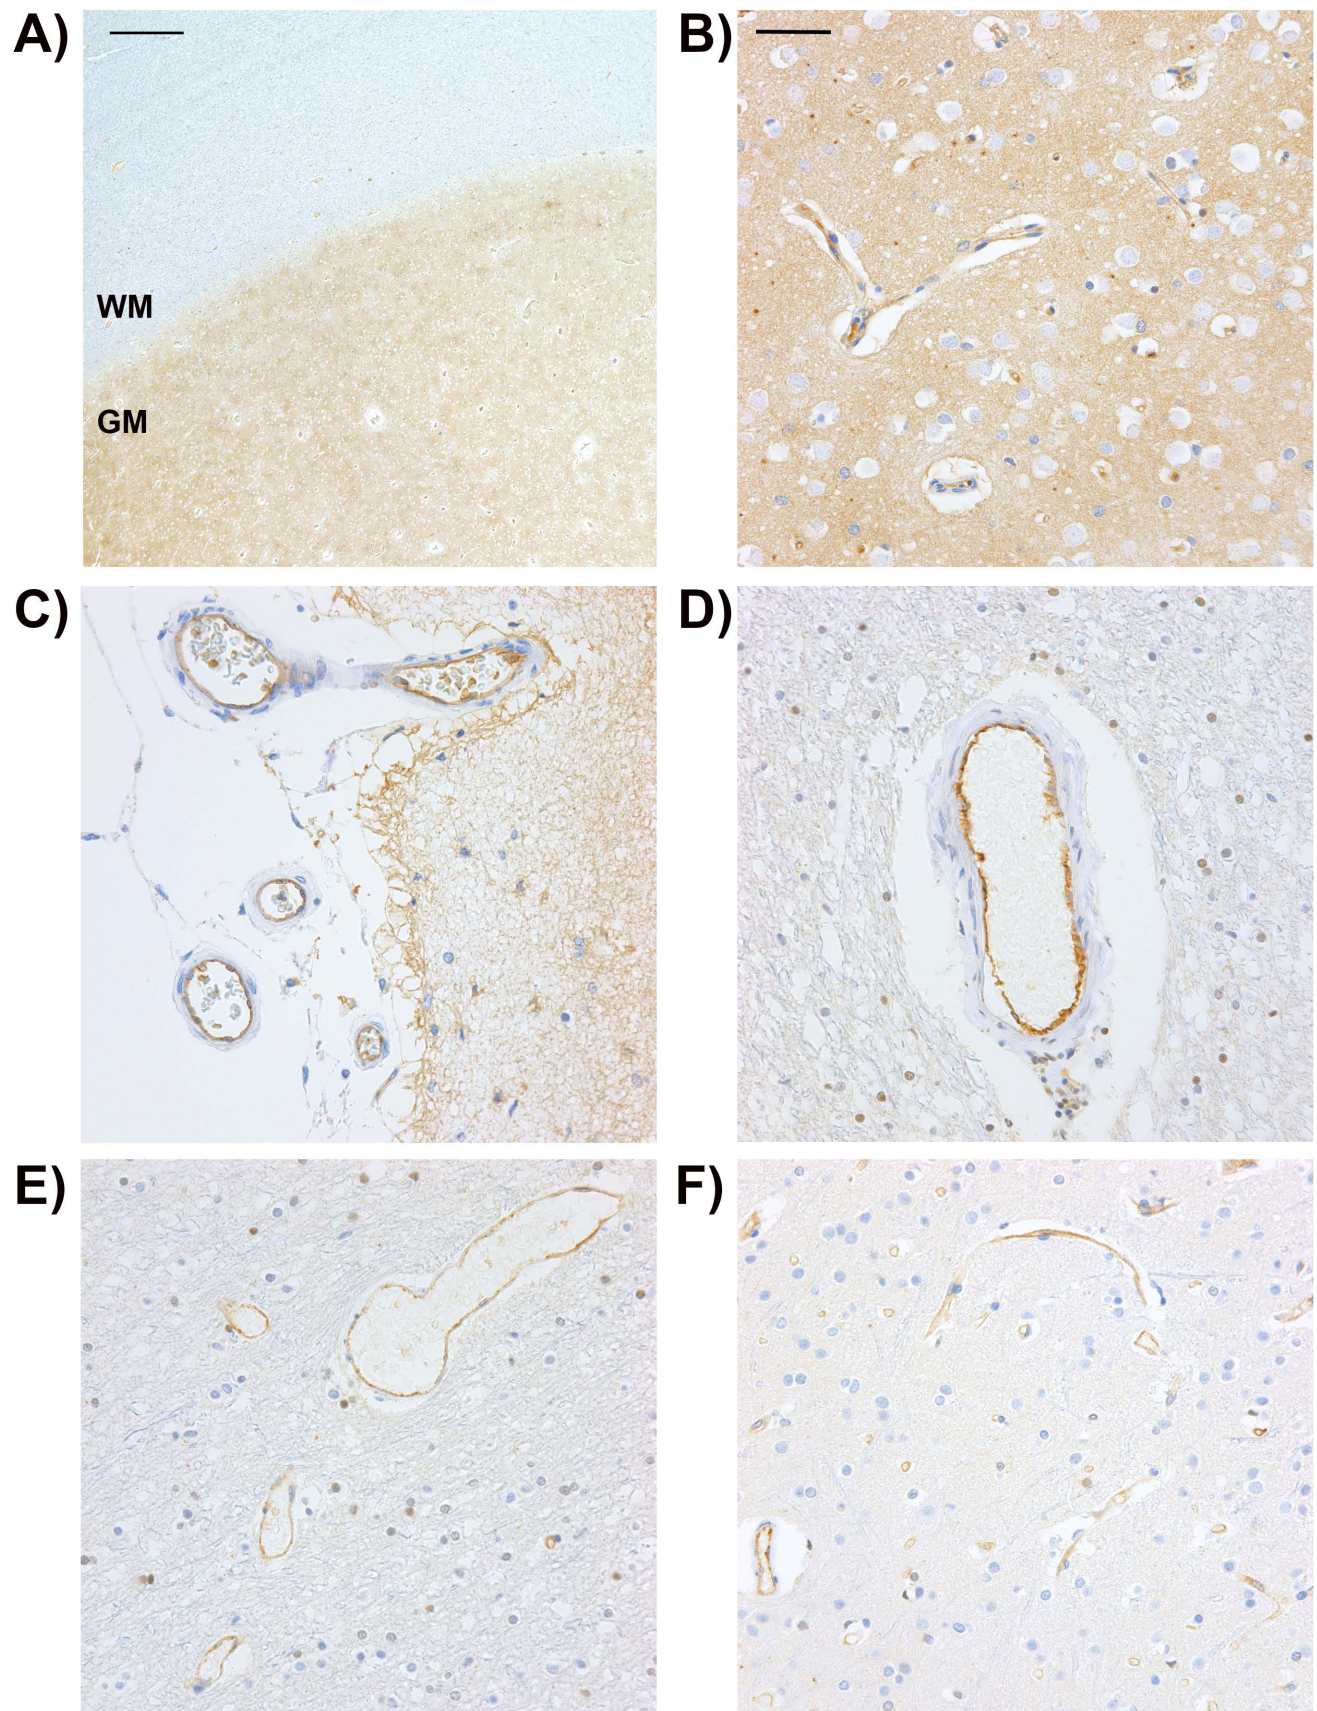

**Figure 3**

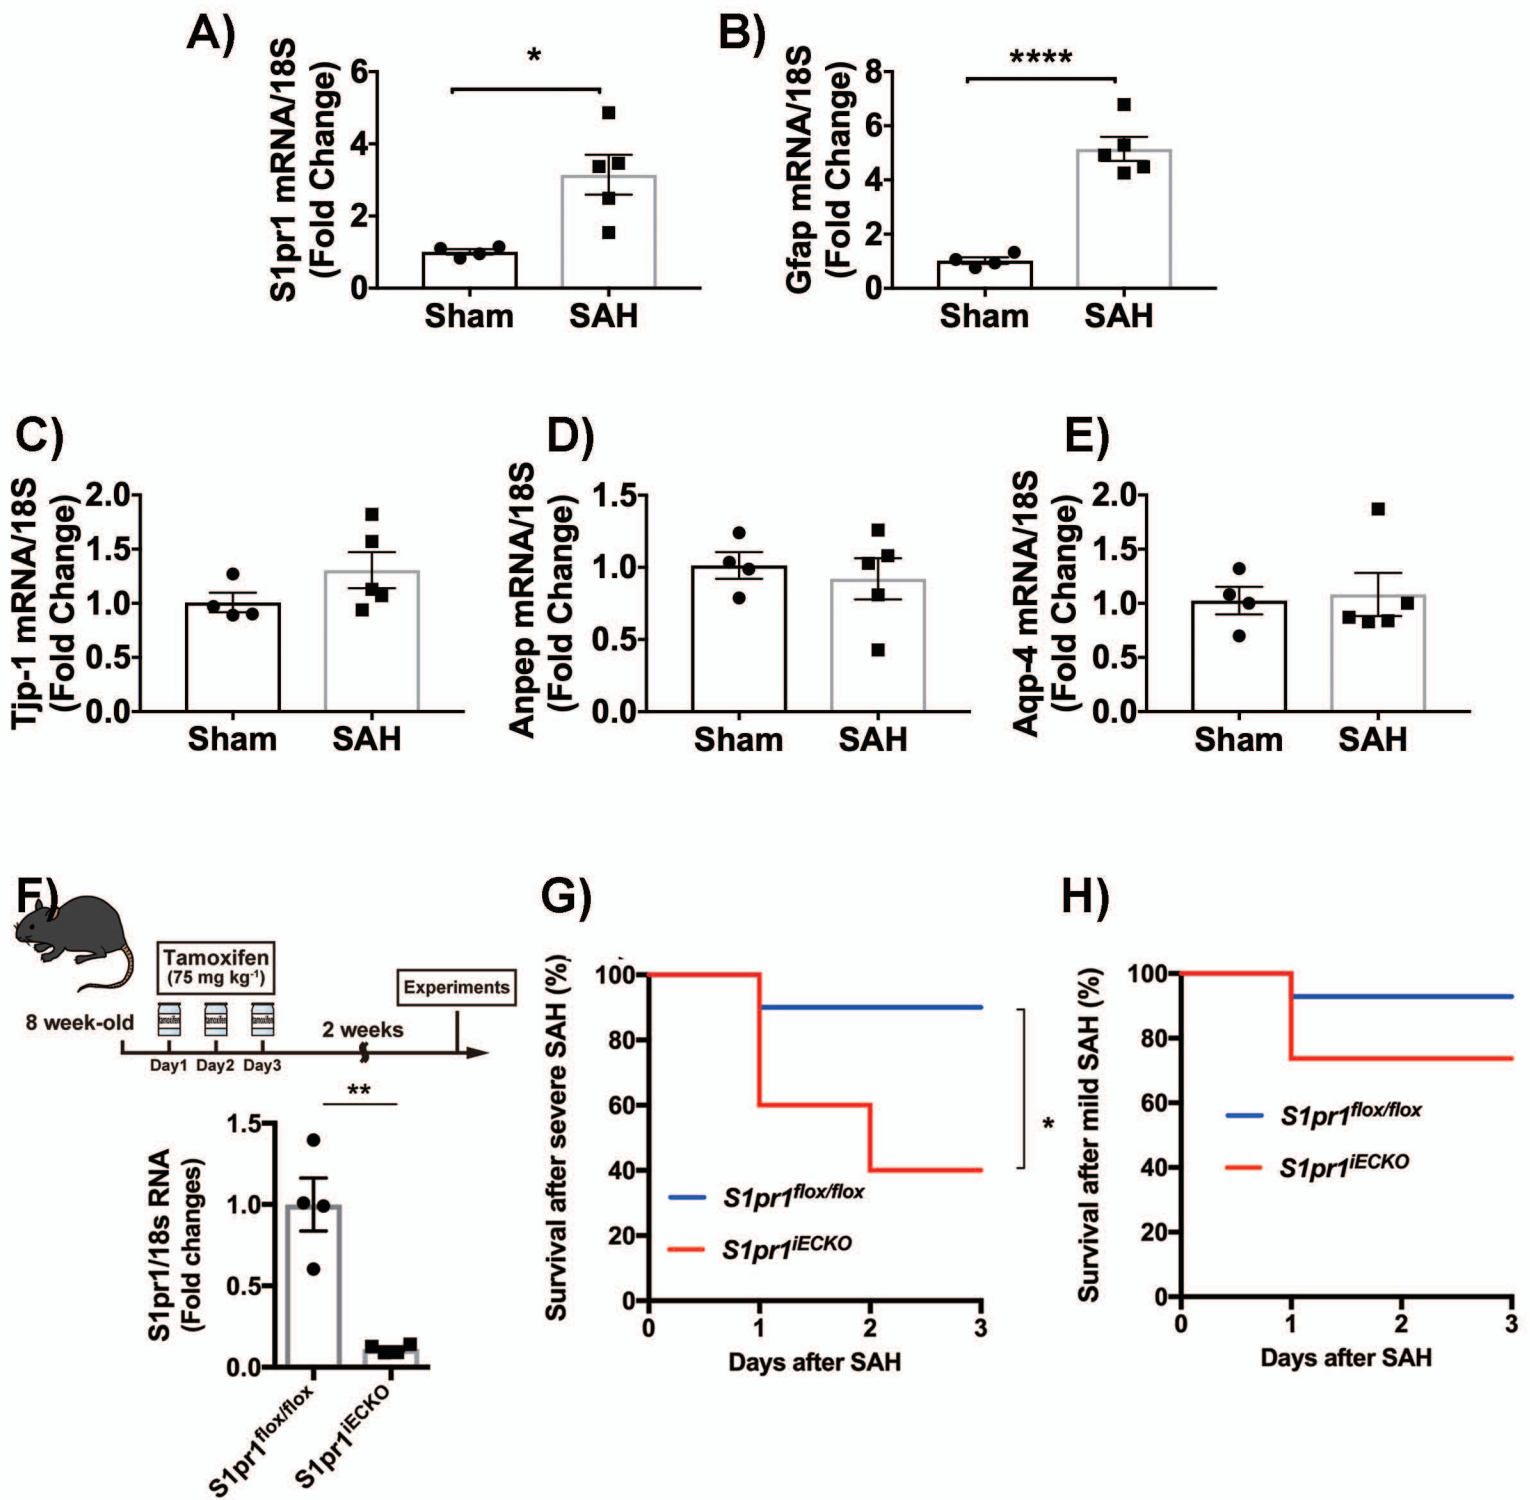

**Figure 4**

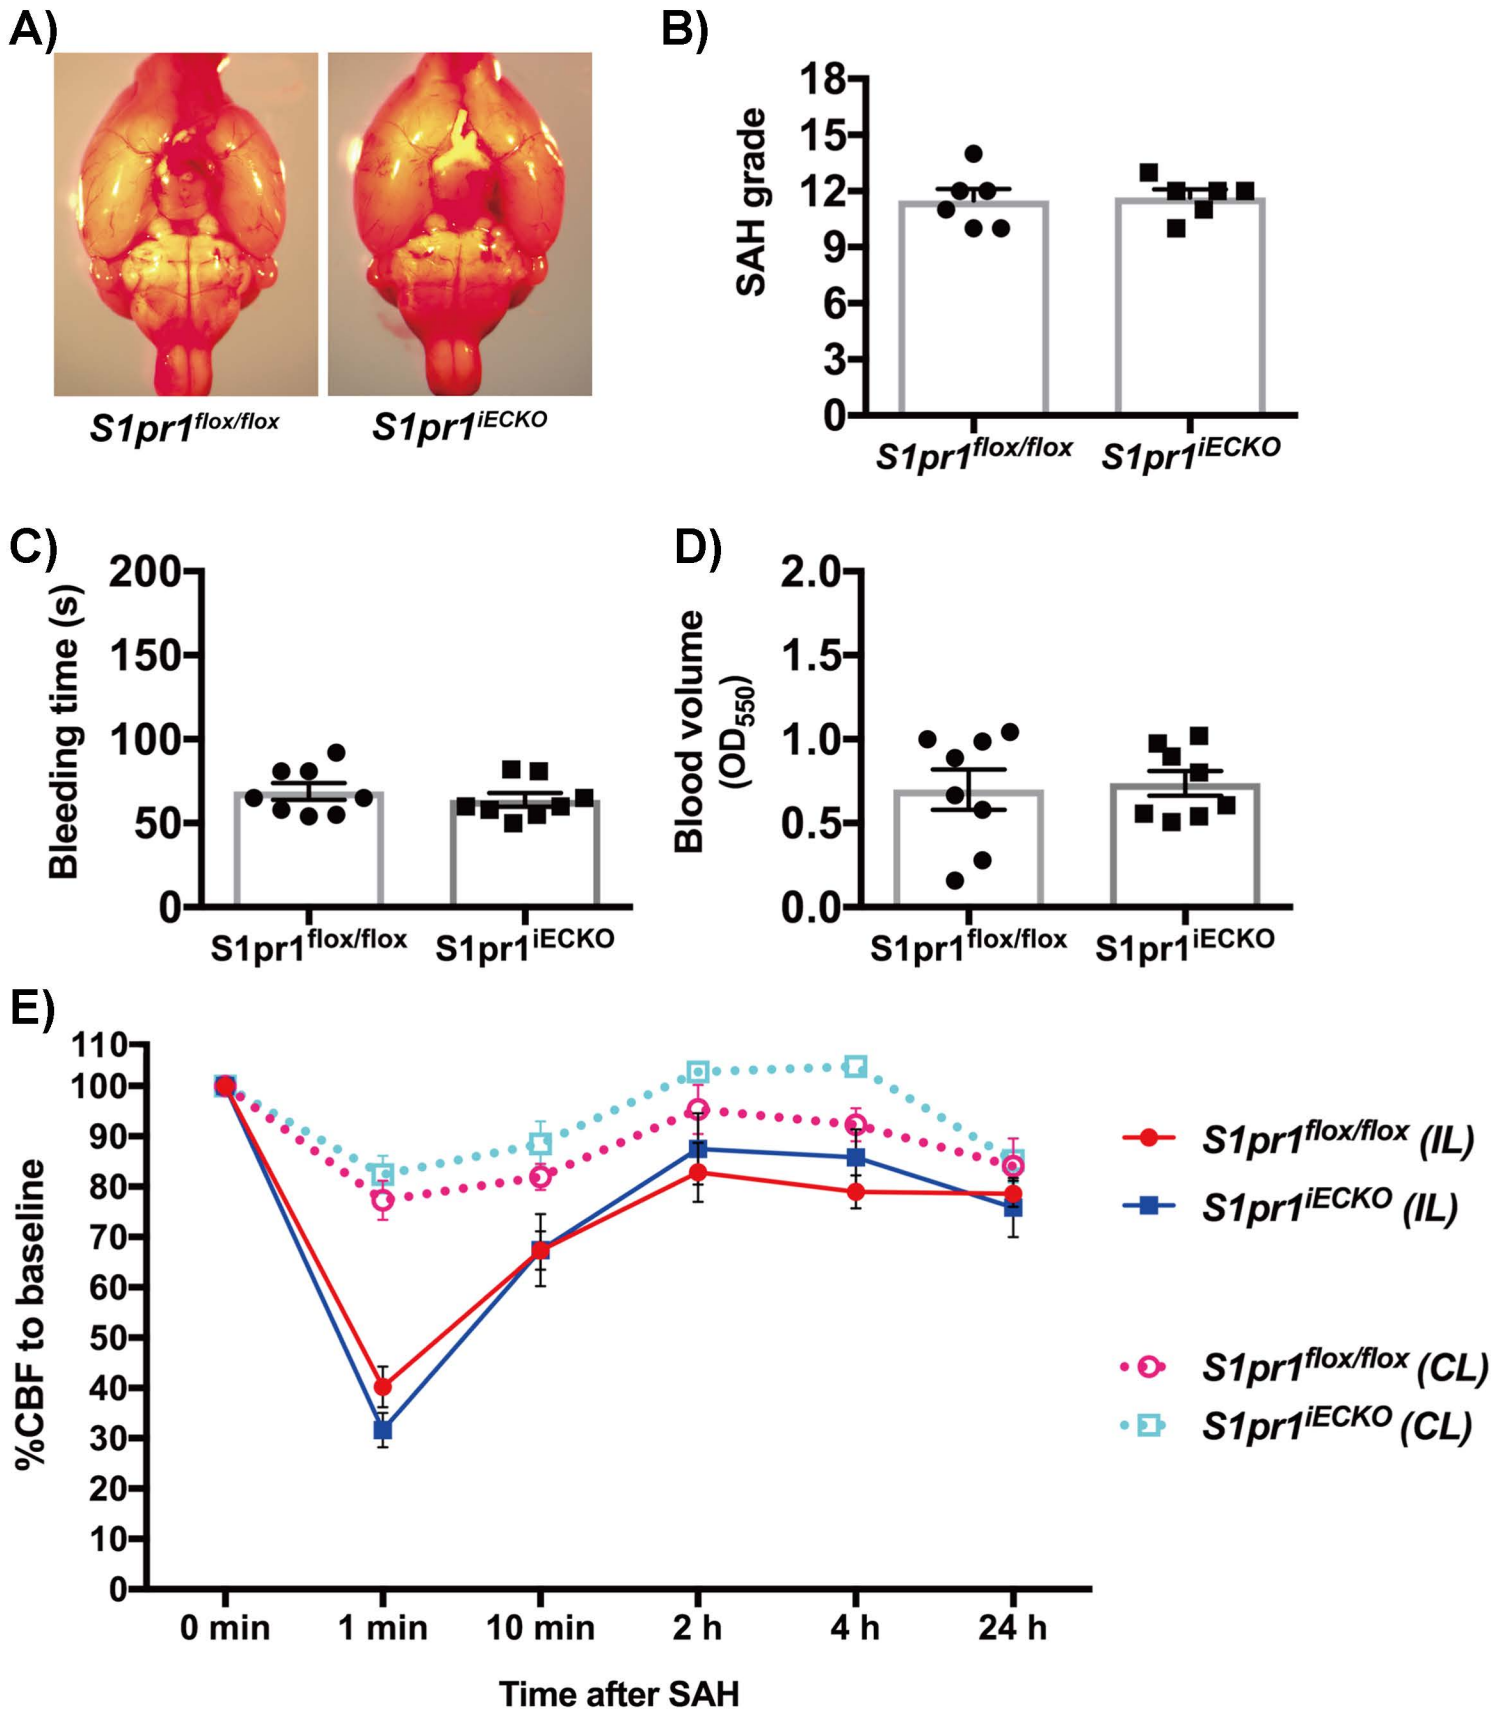

Figure 5

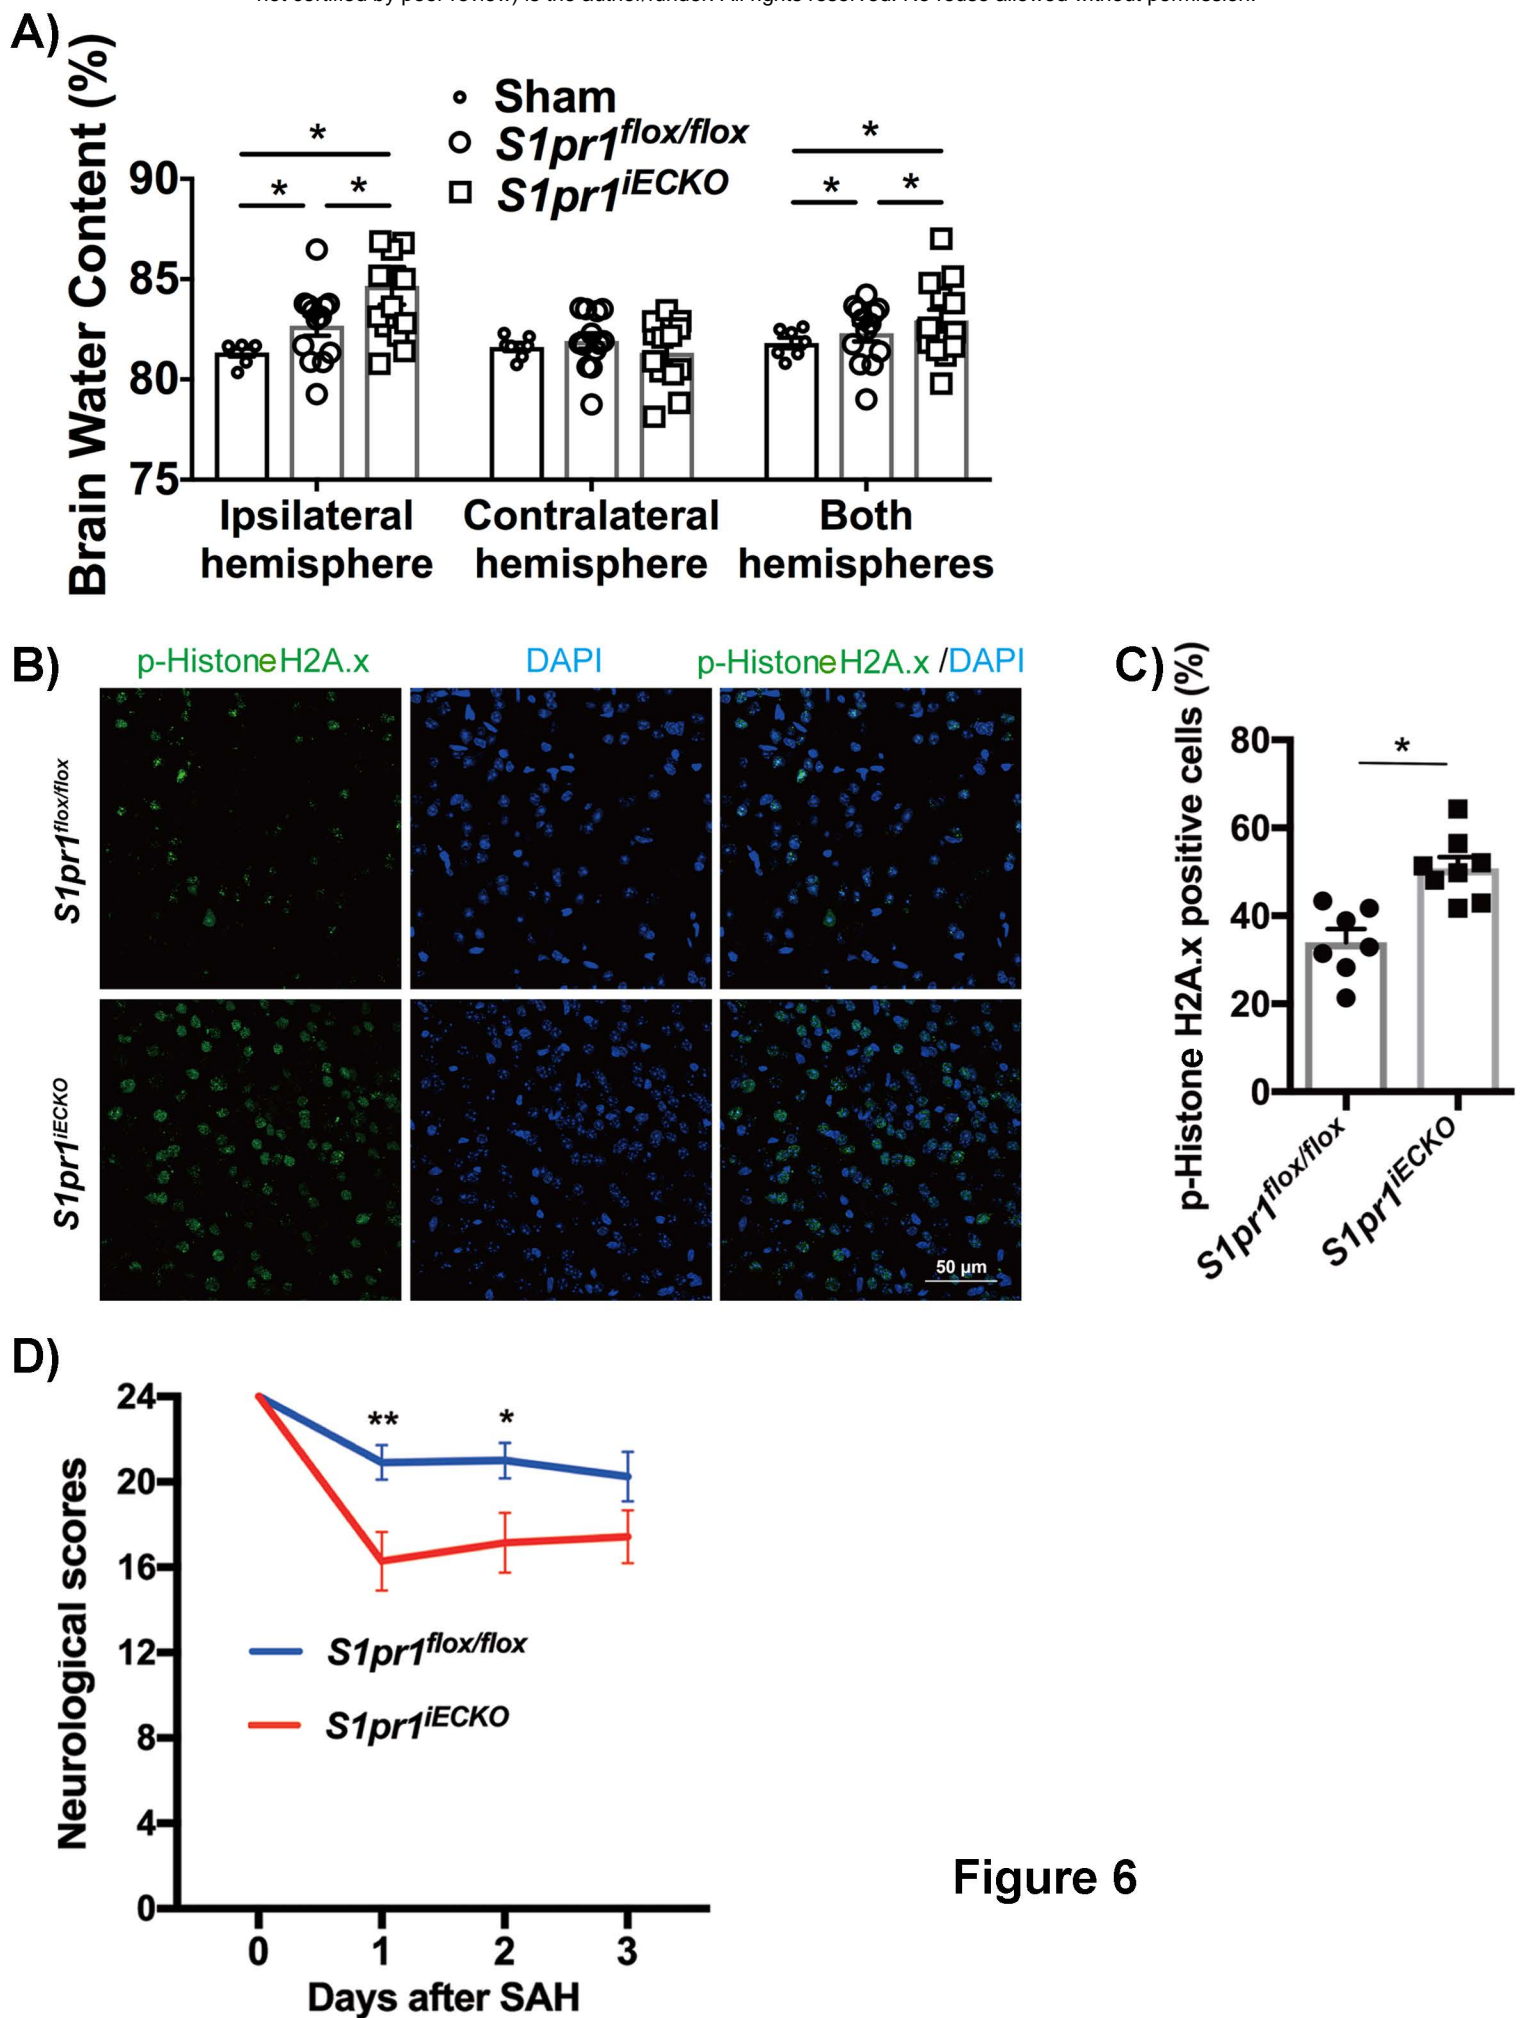

Figure 6

A

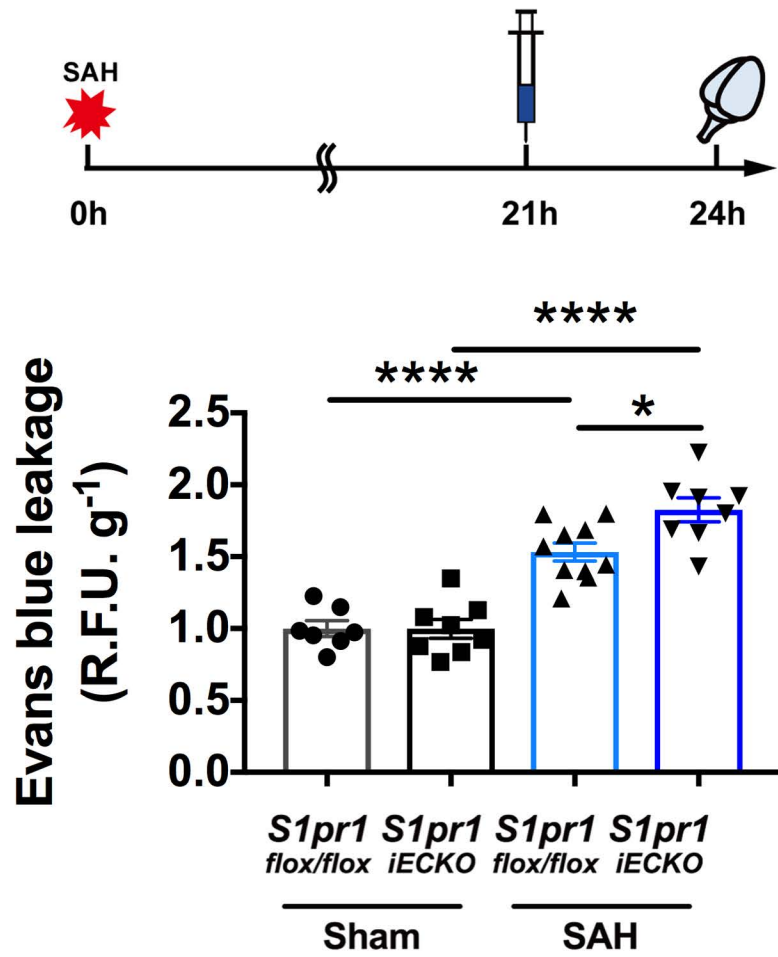

Figure 7

**B**

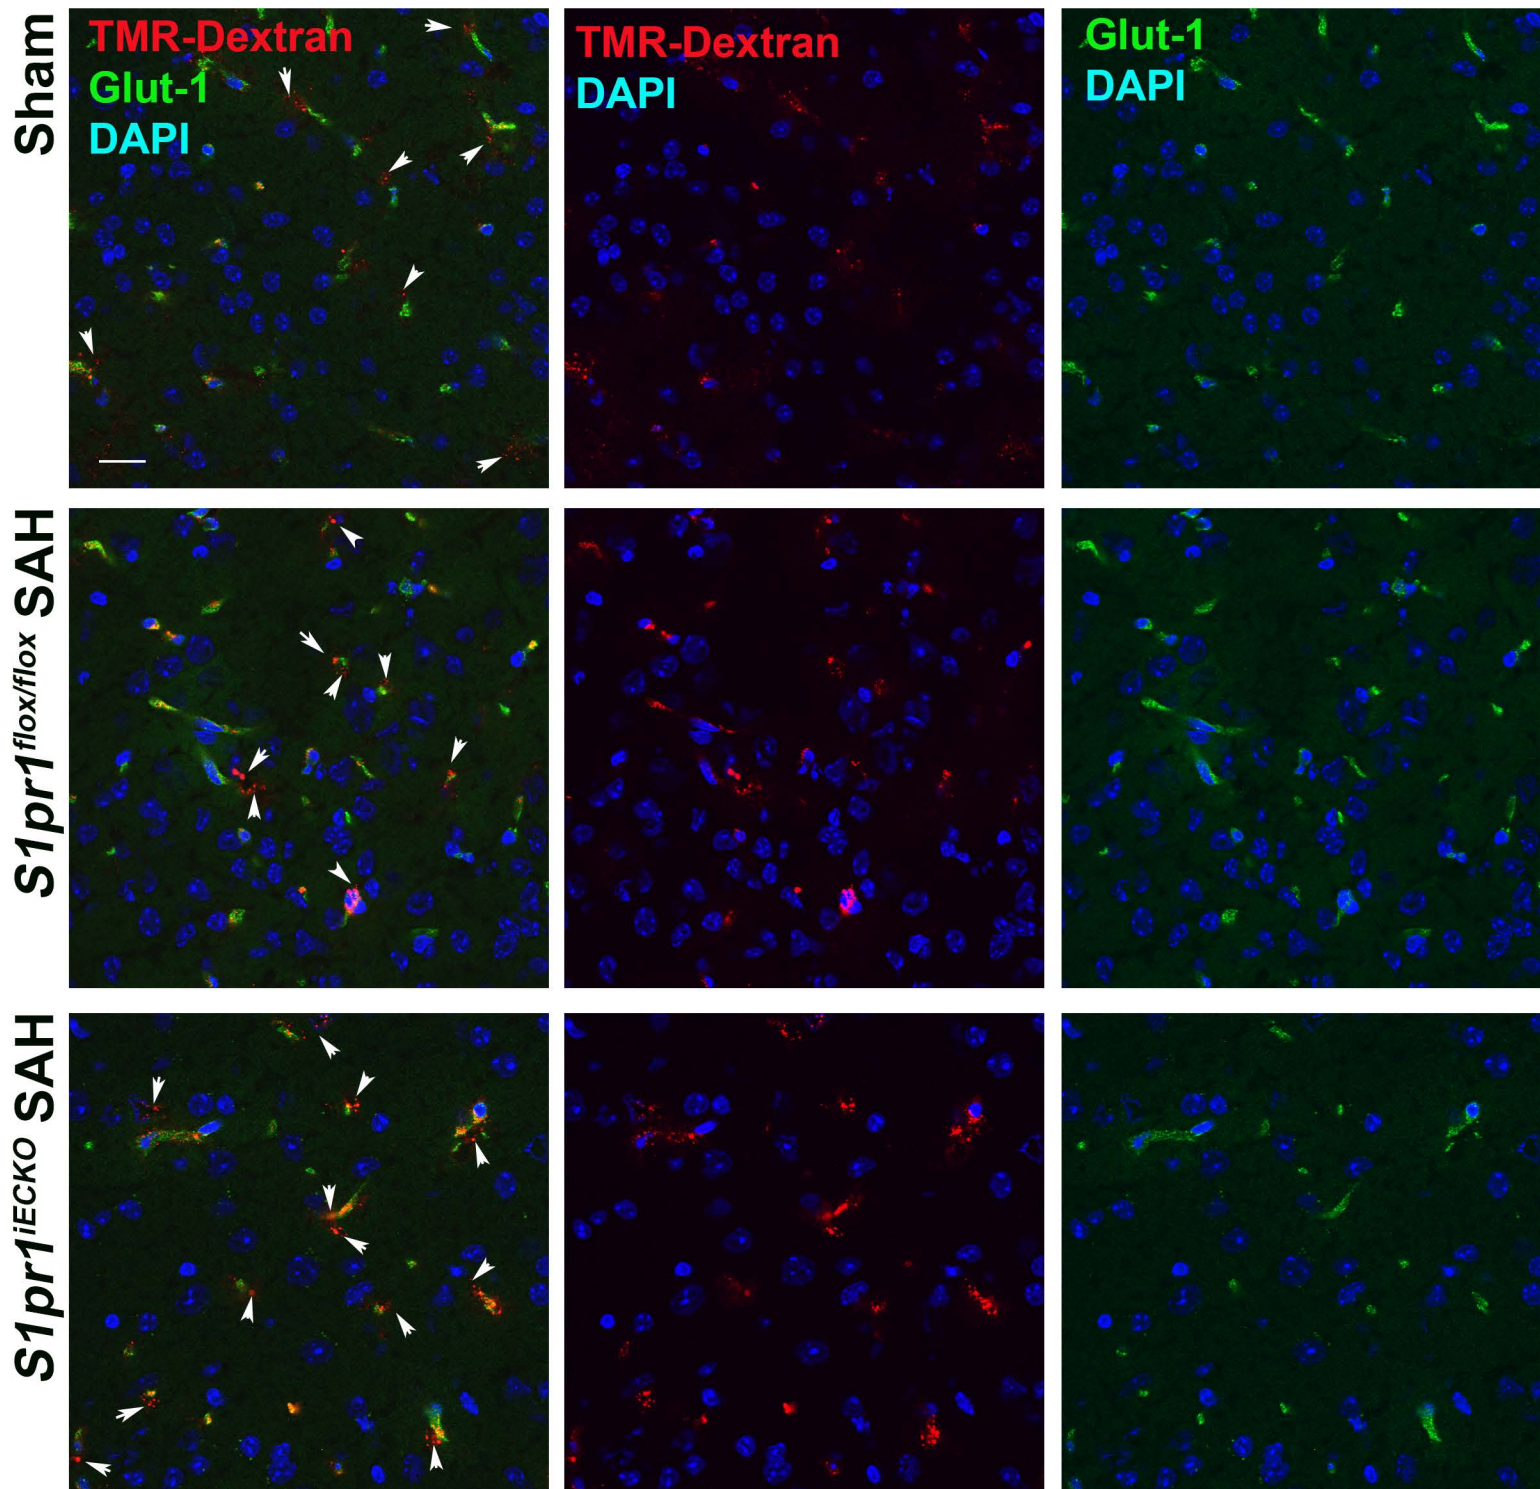

**Figure 7**

C)

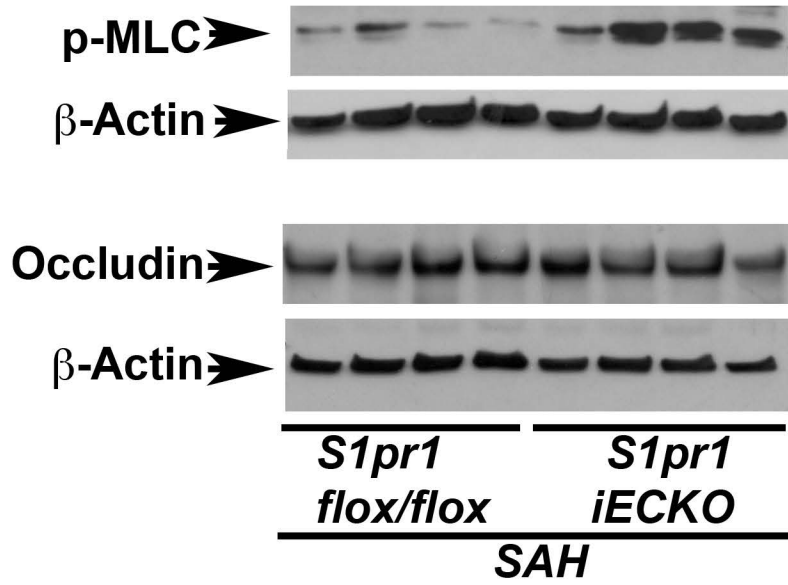

D)

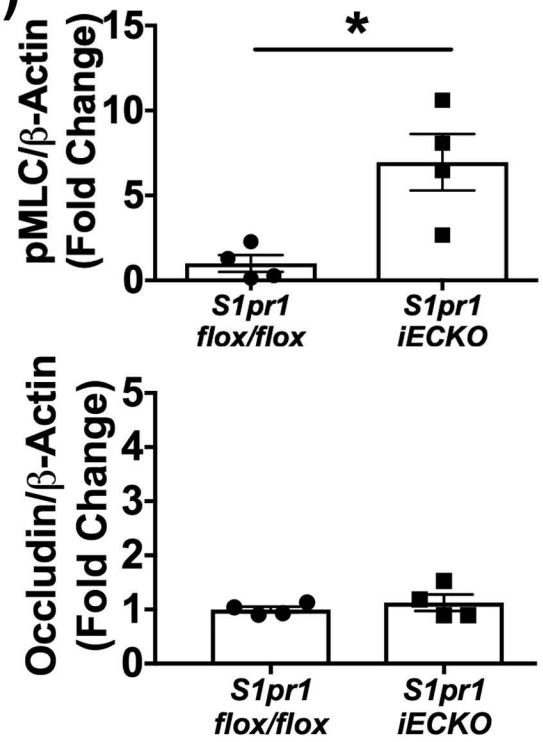

Figure 7

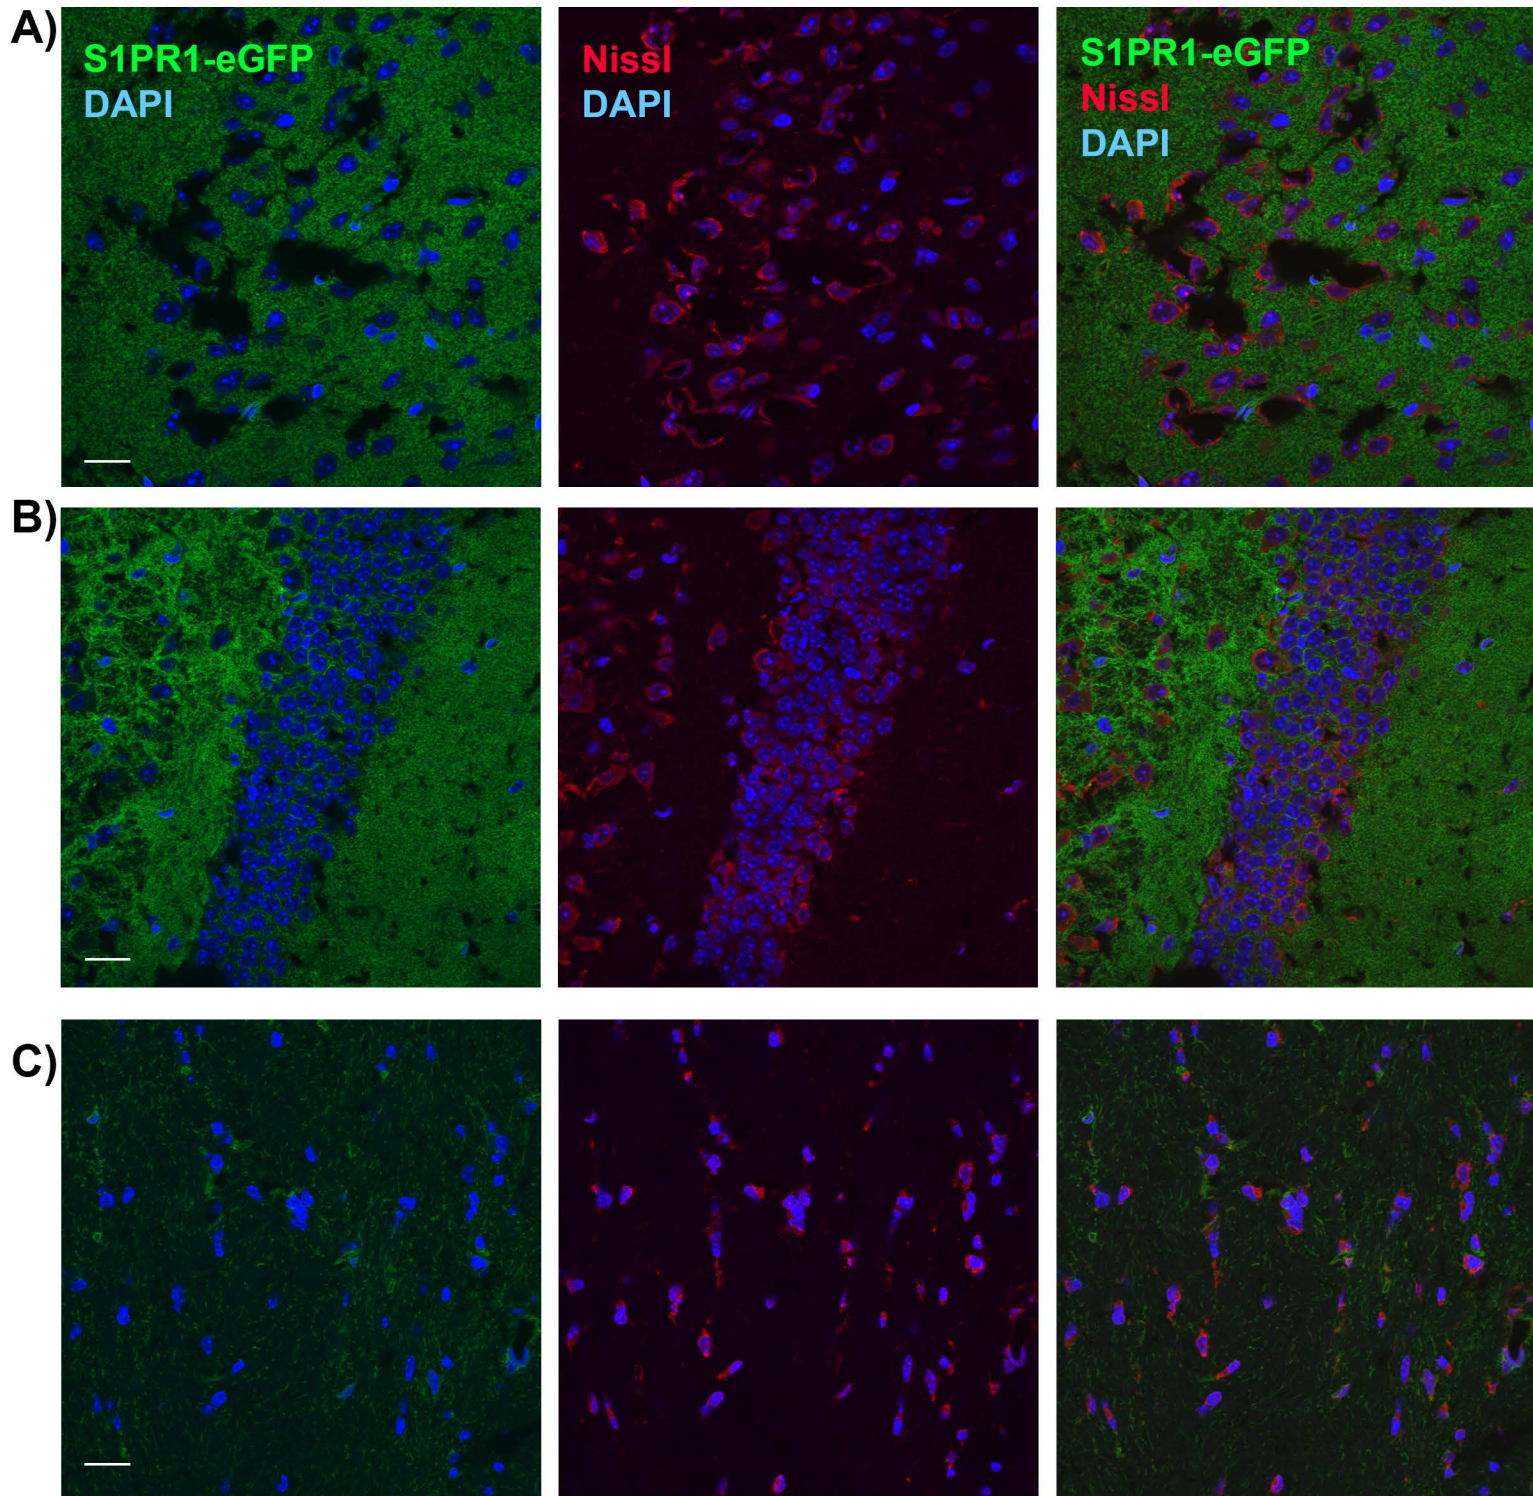

**Supplementary Figure 1**



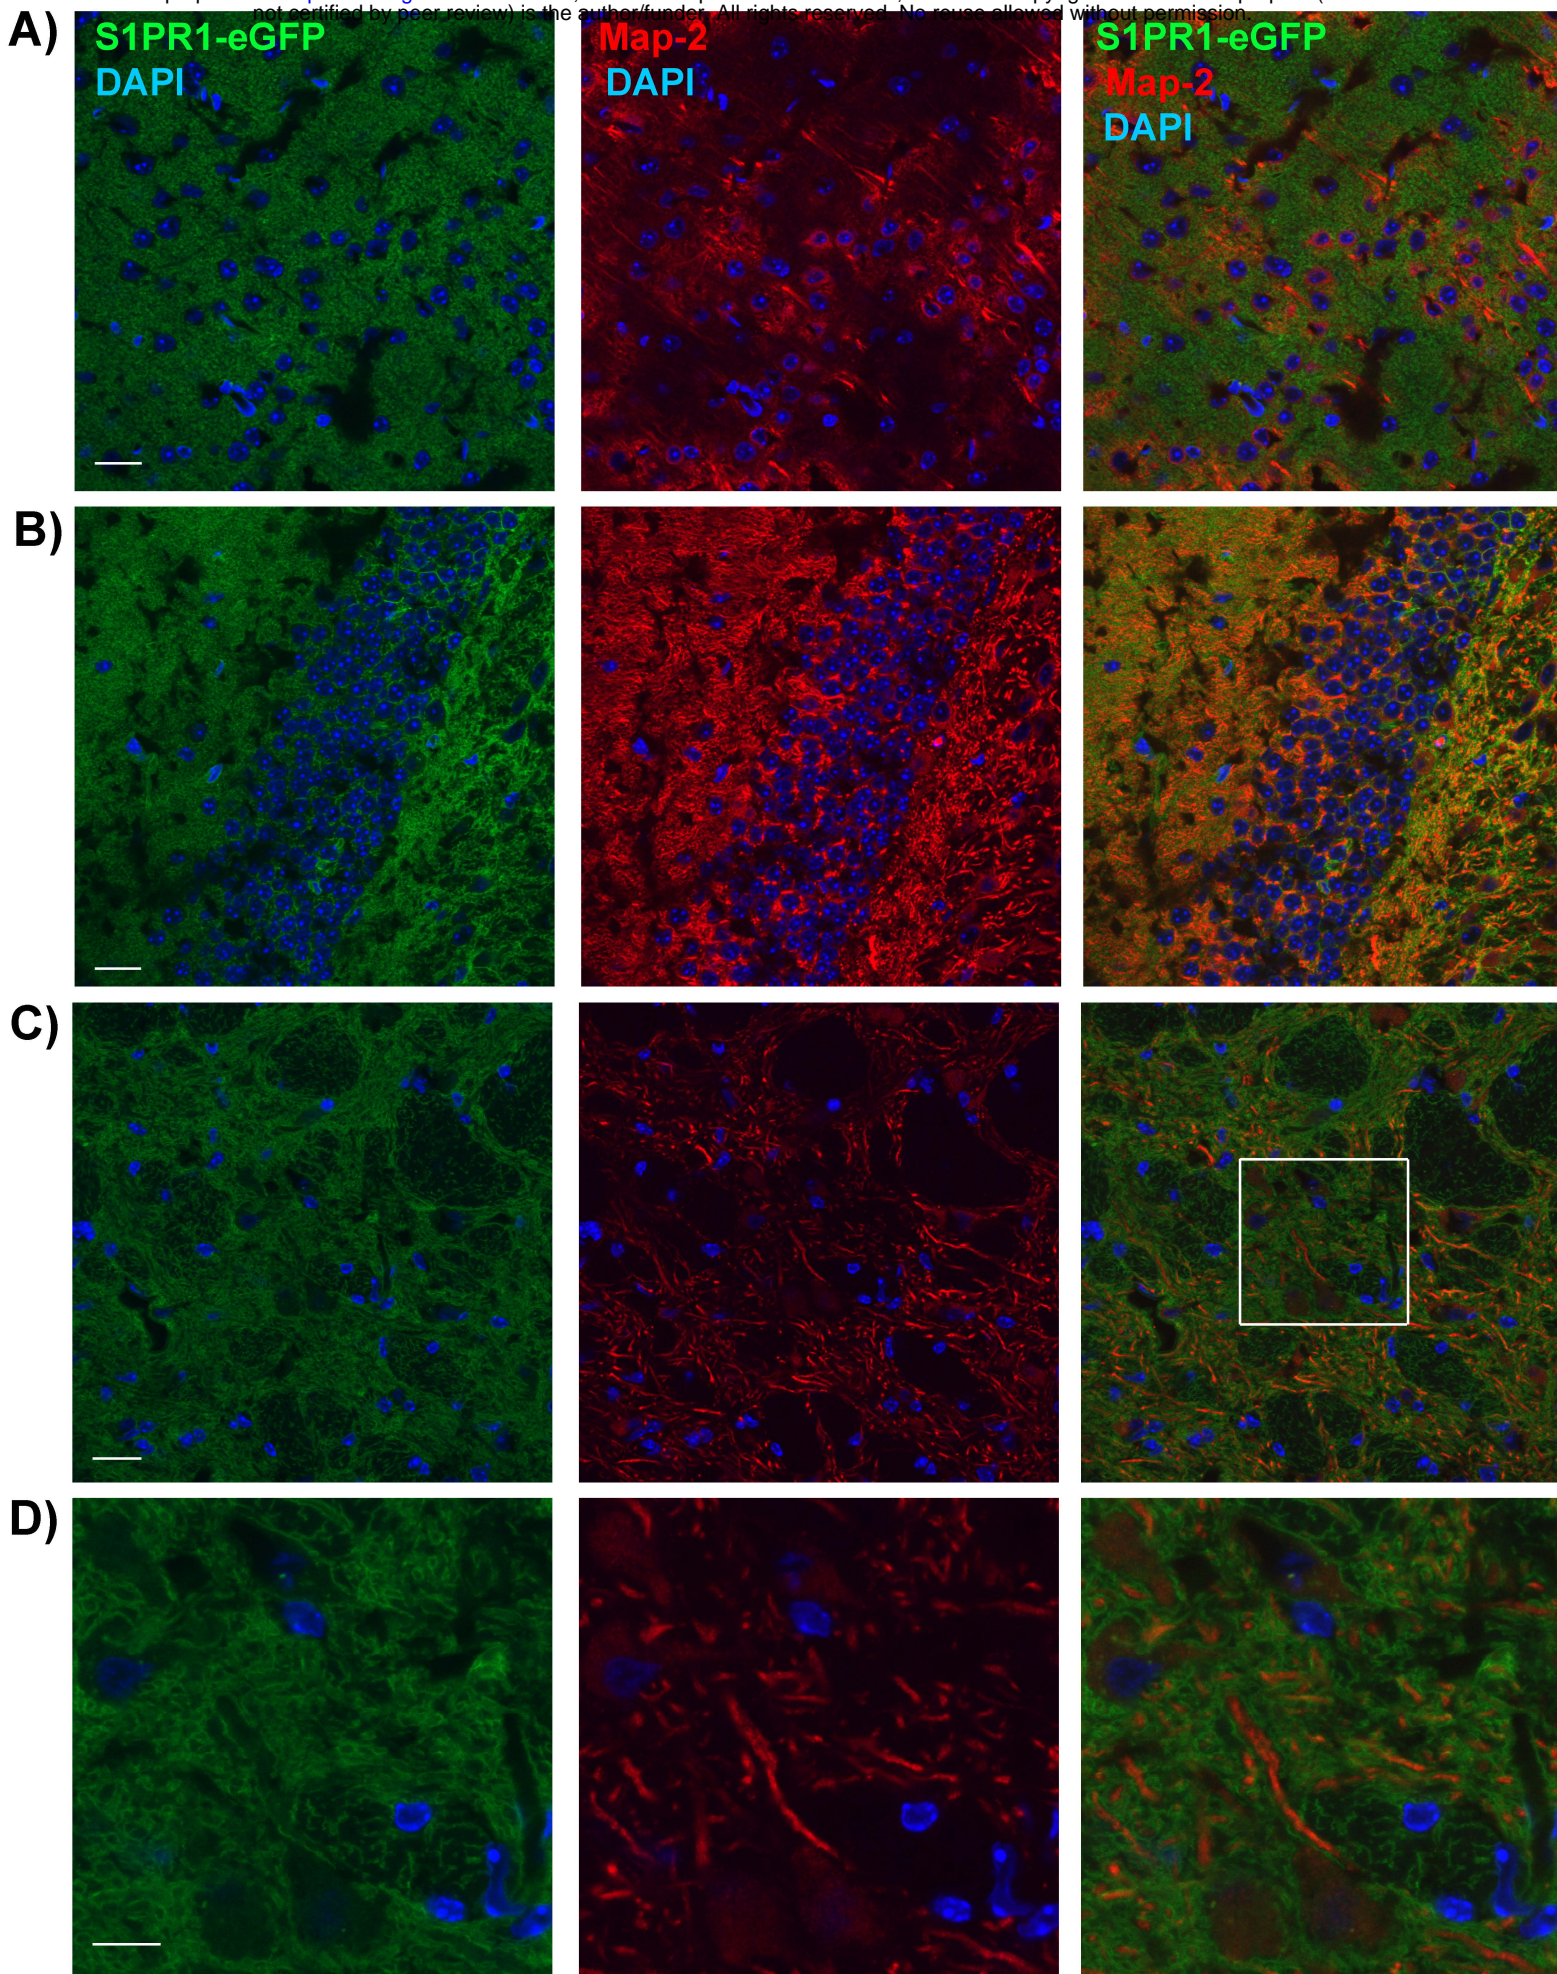

**Supplementary Figure 2**

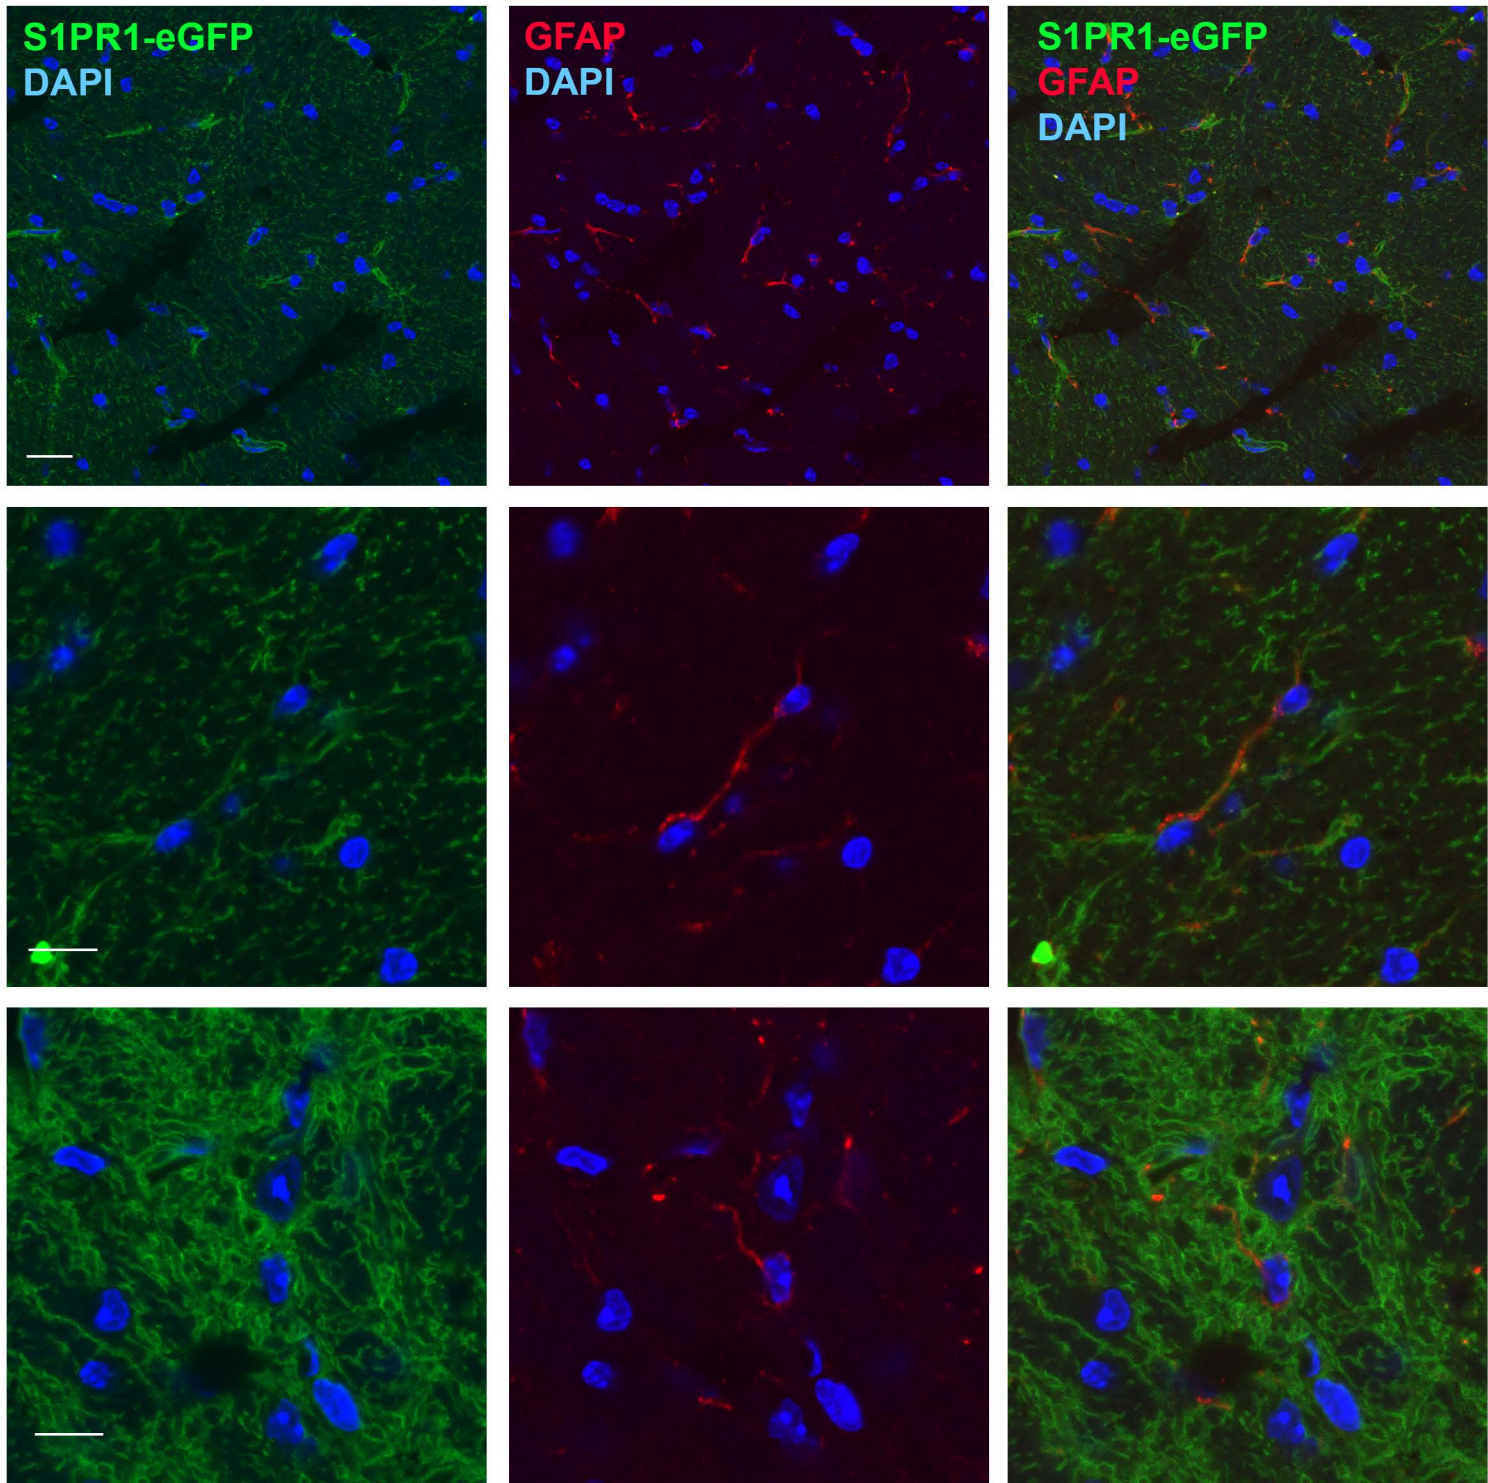

Supplementary Figure 3

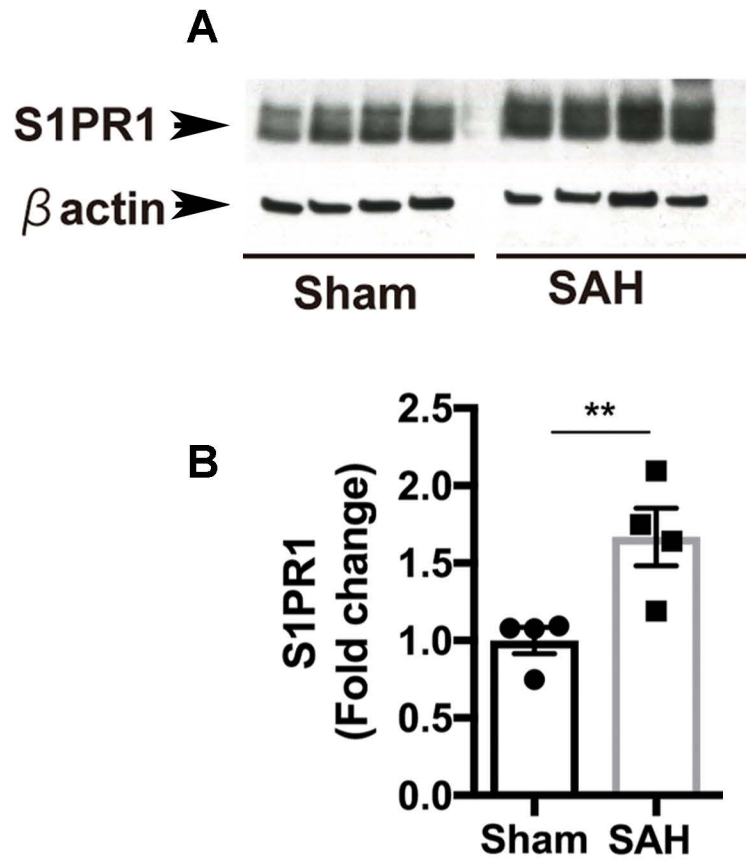

Supplementary Figure 4
